# Supplementary material
Source: MDPI journal article supplement (https://www.mdpi.com/2072-4292/13/16/3262)

**(a)** Boreal Forest/Taiga

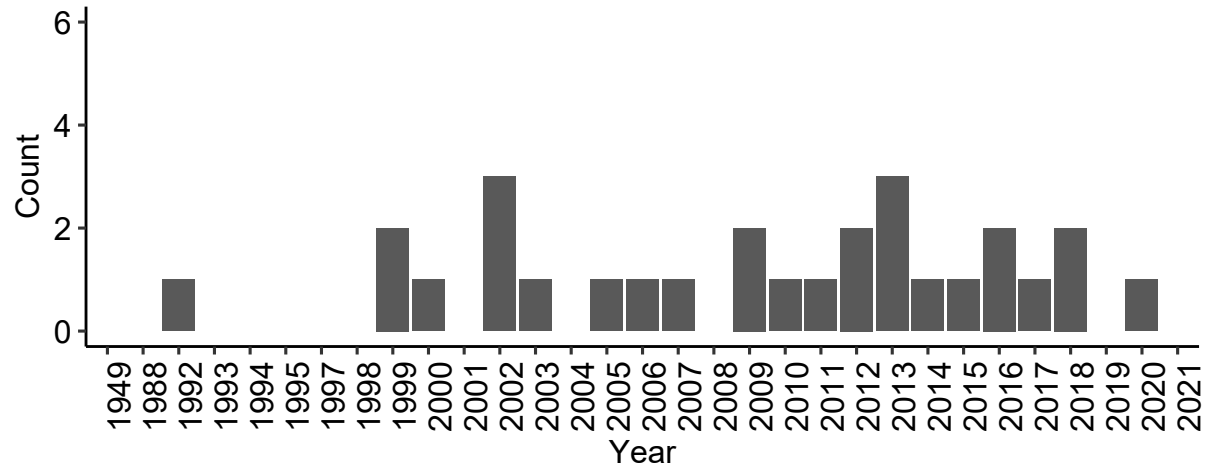

**(b)** Temperate Coniferous Forests

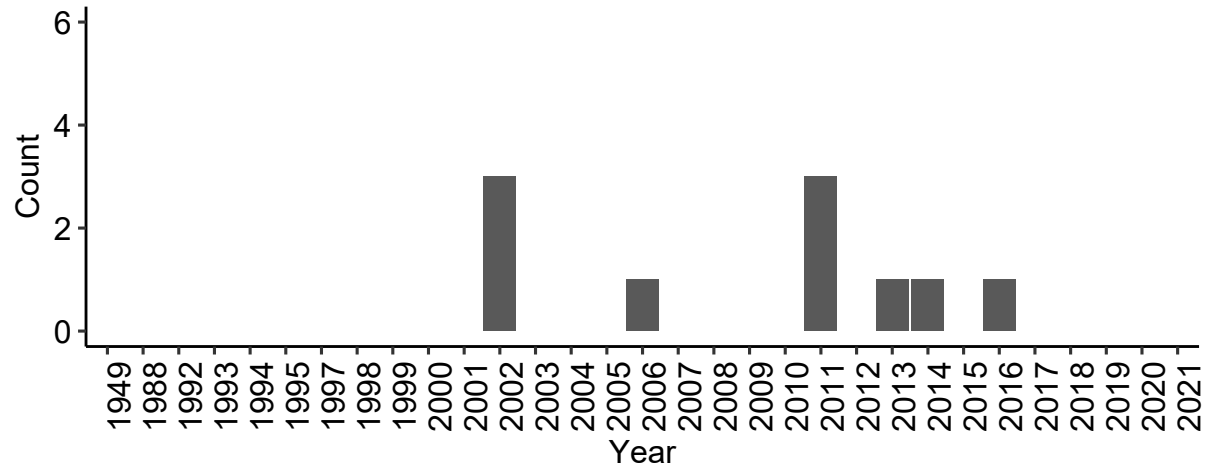

**(c)** Temperate Grasslands, Savannas, Shrublands

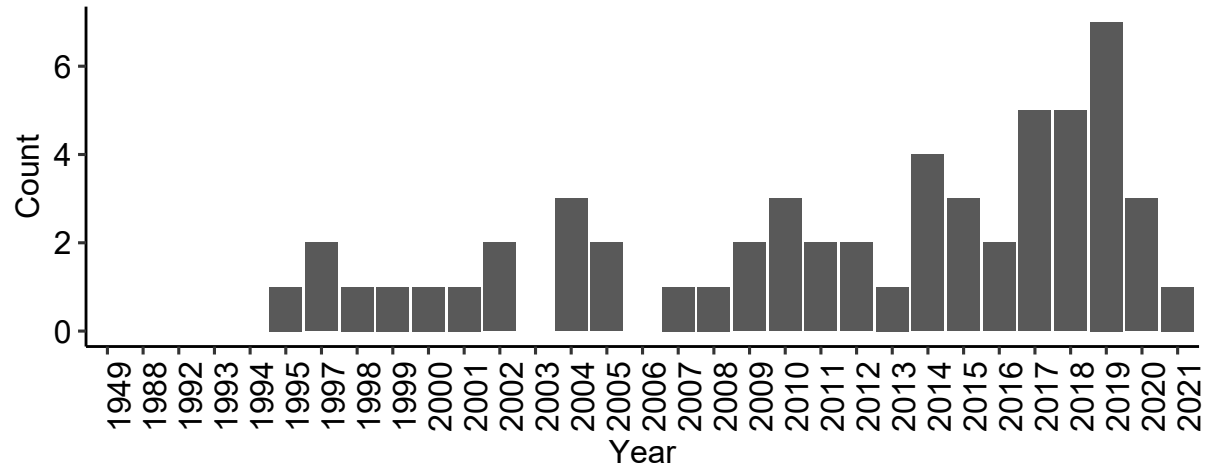

**(d)** Temperate Broadleaf & Mixed Forests

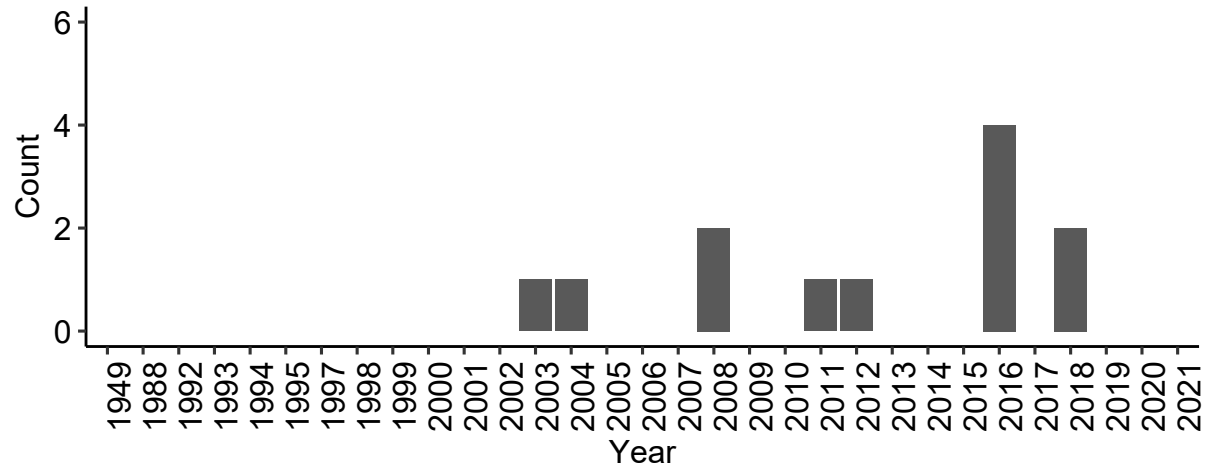

Supplement: s1 [file s1]
