# Supplementary material
Source: MDPI journal article supplement (https://www.mdpi.com/2072-4292/13/16/3262)

**(a)** Direct application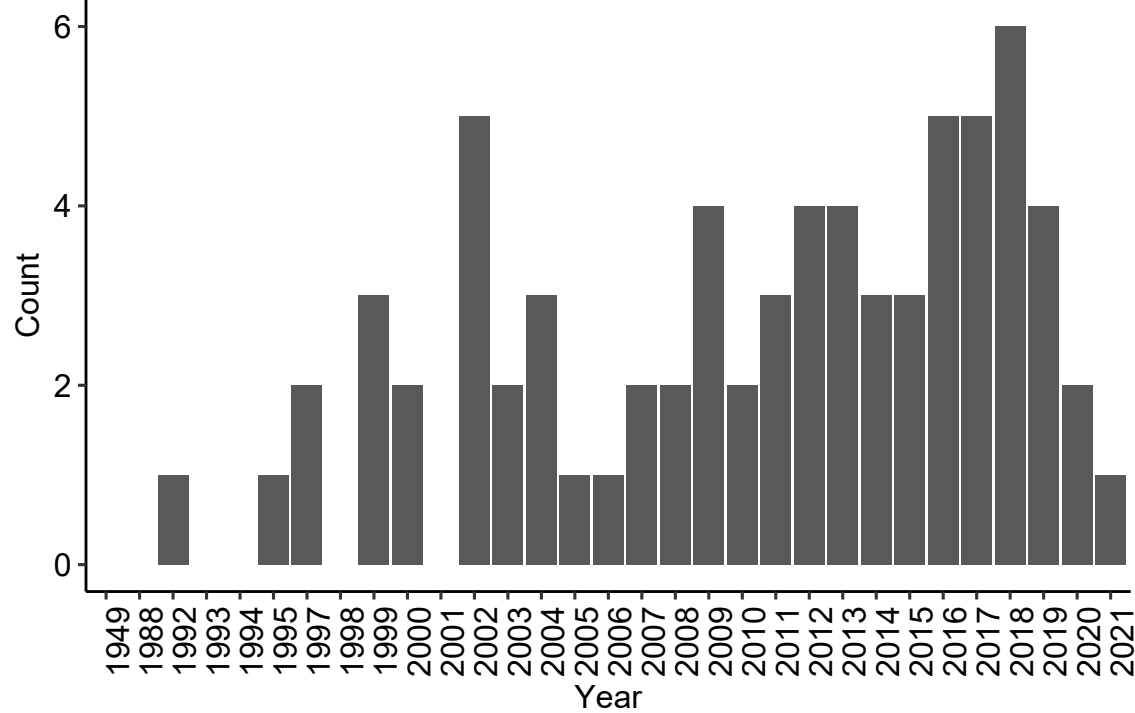**(b)** Fieldbook/Guide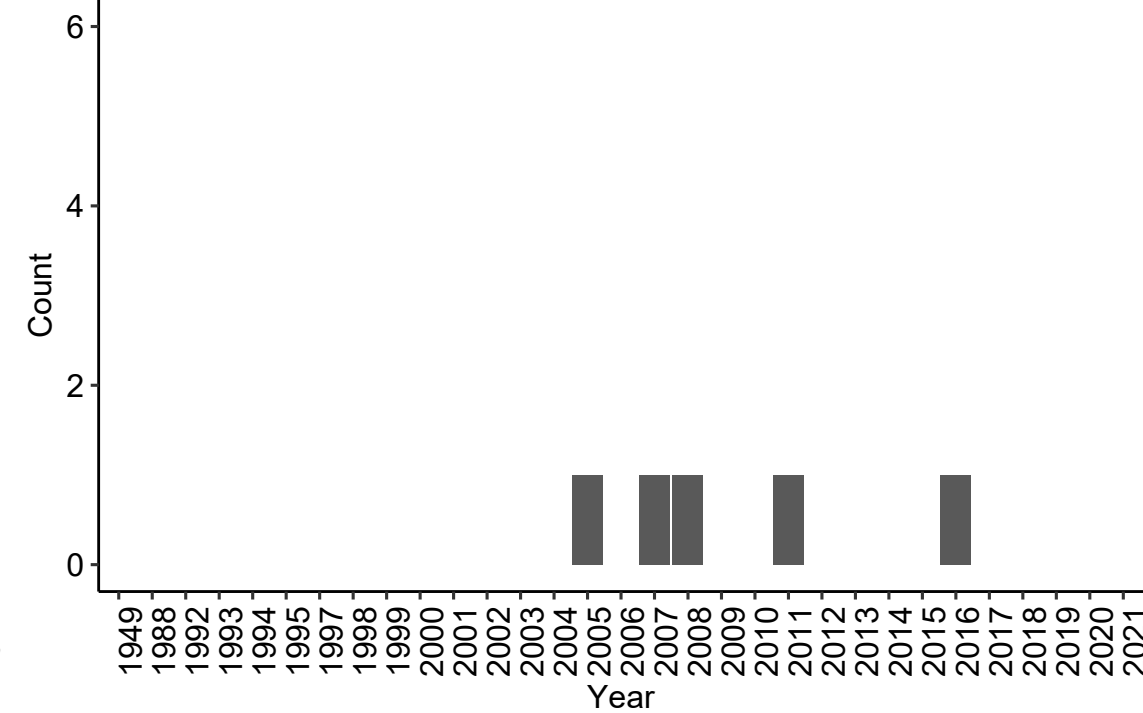**(c)** Indicator description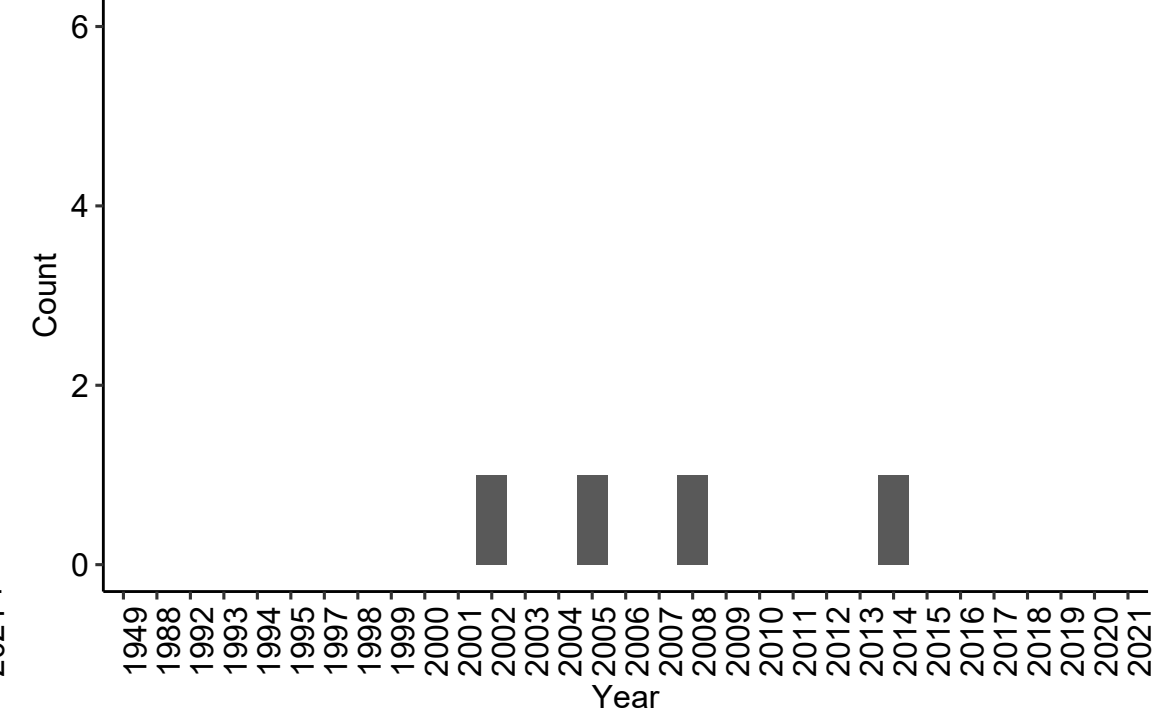**(d)** Report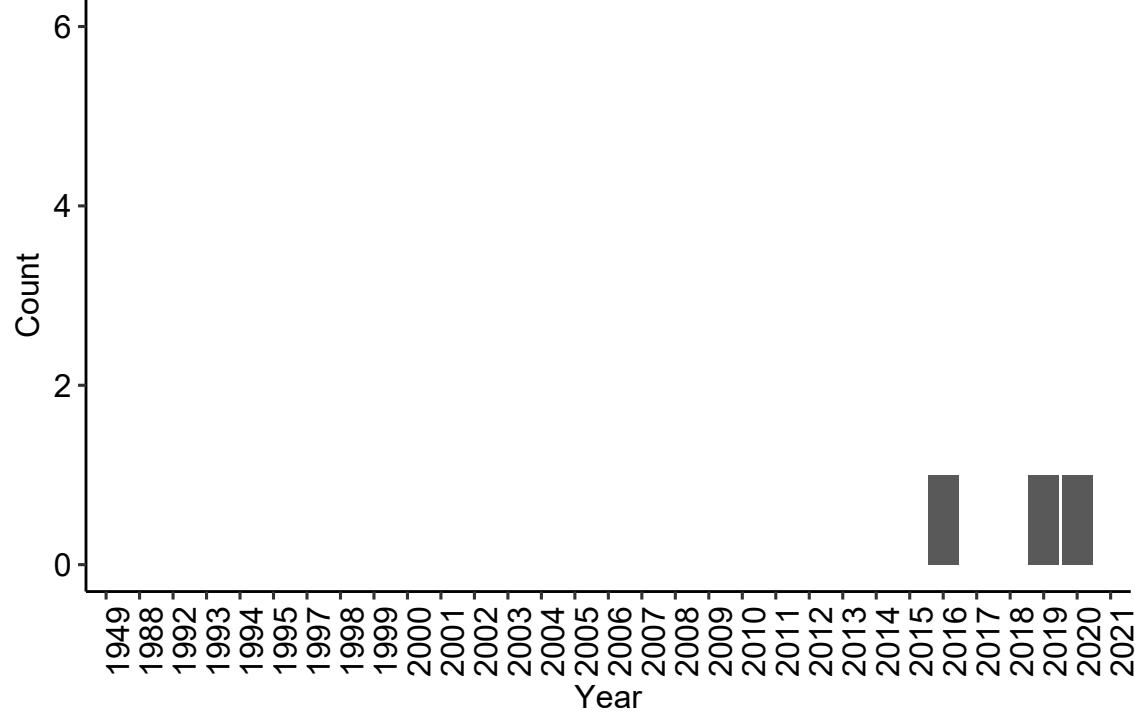**(e)** Review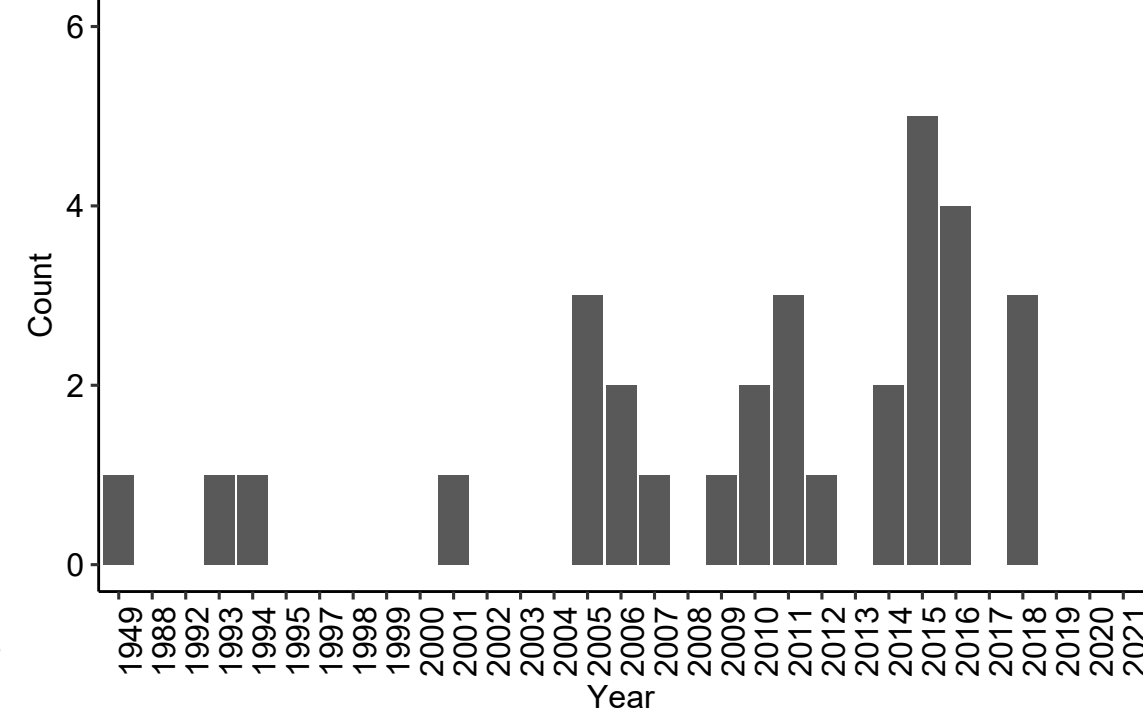**(f)** Theoretical article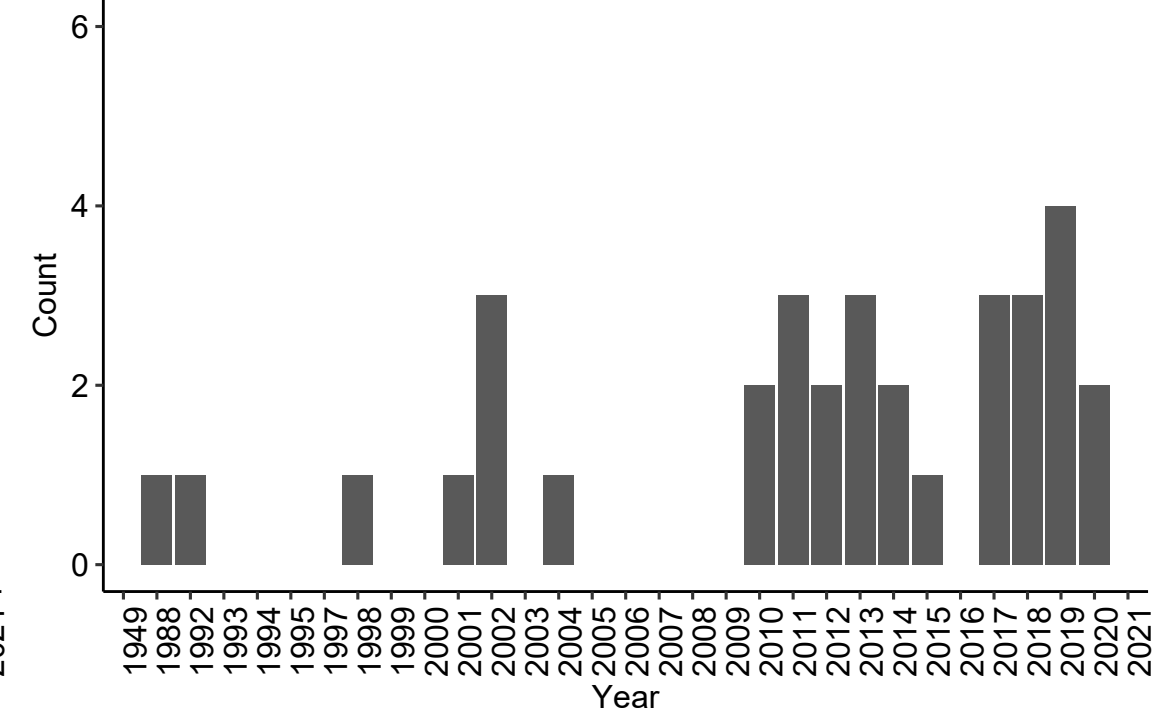

Supplement: s1 [file s1]
