# Supplementary material
Source: MDPI journal article supplement (https://www.mdpi.com/2072-4292/13/16/3262)

**(a)** Climate change

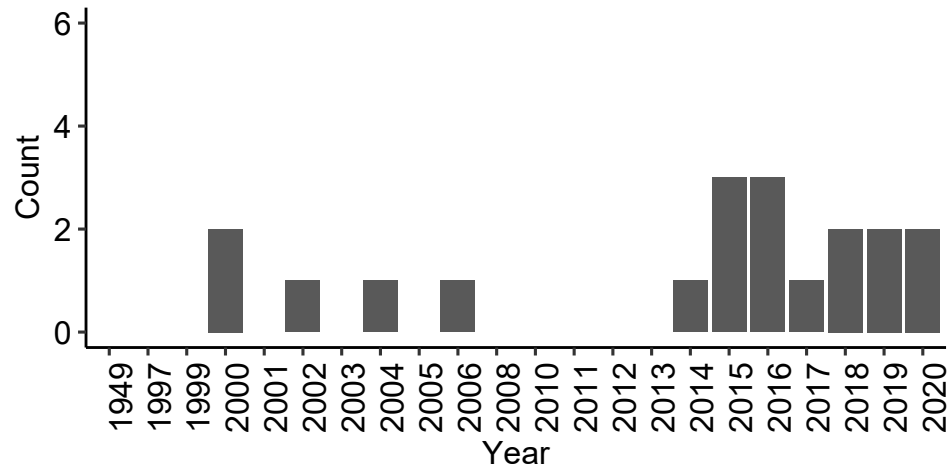

**(b)** Grazing

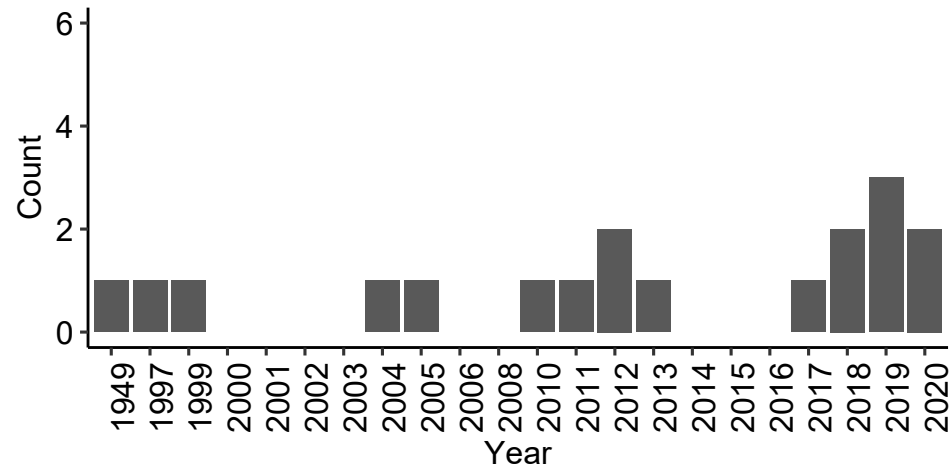

**(c)** Fire regime

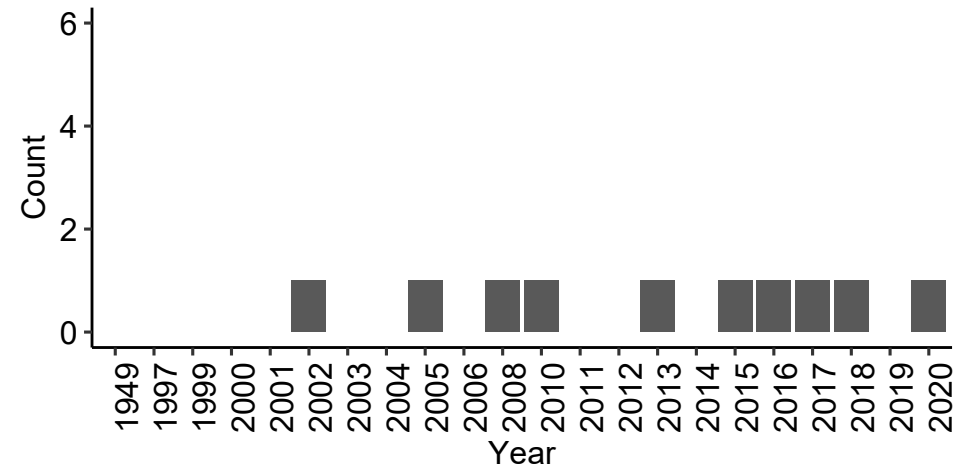

**(d)** Insect infestation

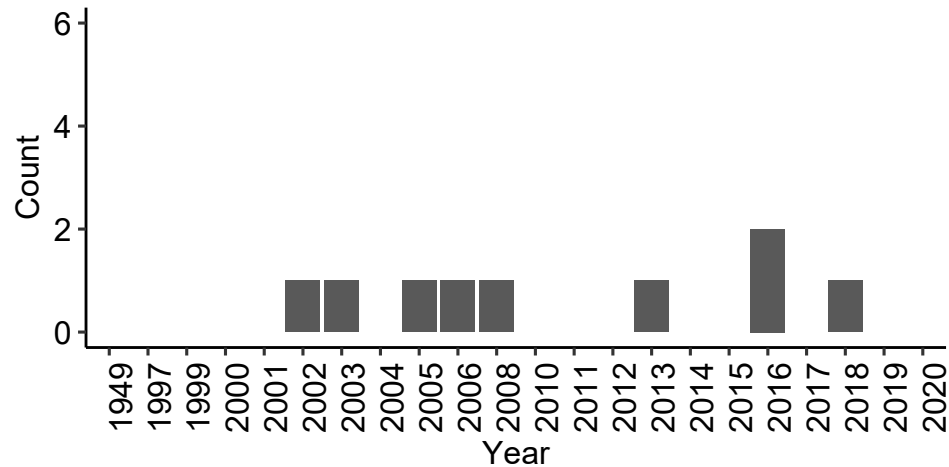

**(e)** Invasive species and noxious weeds

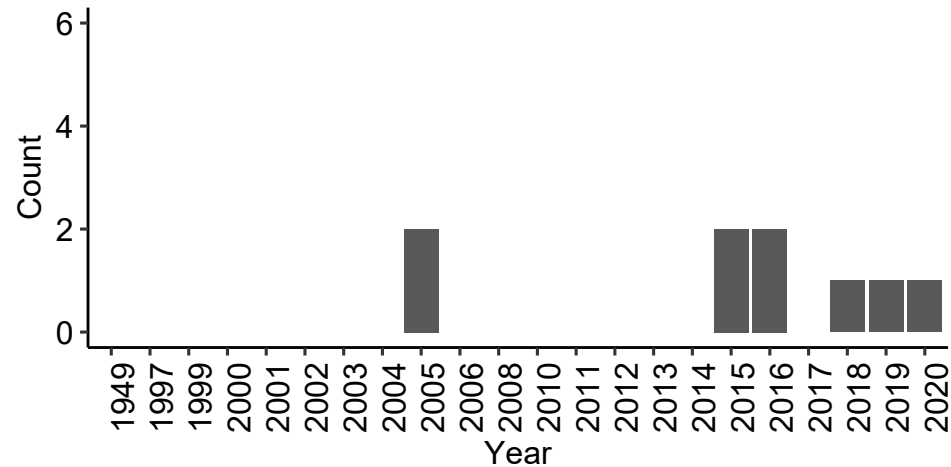

Supplement: s1 [file s1]
