# Supplementary material
Source: MDPI journal article supplement (https://www.mdpi.com/2072-4292/13/16/3262)
Supplement: s1 [file s1]

**Table S1.** Criteria for ecosystem health indicator selection (in bold are the criteria that are covered by using remote sensing data)

| Criterion                                             | Details                                                                                                                                                                                                                                                                                                            | Source                 |
|-------------------------------------------------------|--------------------------------------------------------------------------------------------------------------------------------------------------------------------------------------------------------------------------------------------------------------------------------------------------------------------|------------------------|
| Assesses integrative ecosystem health                 | Vigor, organization, resilience                                                                                                                                                                                                                                                                                    | [65]                   |
| Describes the status of an ecosystem                  | Decline of nutrient pools, primary productivity, species diversity                                                                                                                                                                                                                                                 | [25,65,66]             |
| Reflects function and structure of an ecosystem       | Species composition, distribution, abundance, tolerance, adaptability, efficiency across different scales                                                                                                                                                                                                          | [11,65–68]             |
| Represents sustainability of human-coupled ecosystems | Biophysical and social-economic ecosystem services                                                                                                                                                                                                                                                                 | [11,25,65,68]          |
| Representative of the ecosystem and interpretable     | Sensitive to stresses, strong scientific basis, <b>quantifiable</b> , expected responses to stress, corresponds to <b>broad geographic extends</b> , historical record available                                                                                                                                   | [11,12,16,25,26,65–68] |
| Related to management goals                           | <b>Easy to apply, cost-effective, integrative</b> (summarizing many indicators), <b>nondestructive to the ecosystem</b> , potential for <b>measurement continuity</b> , not redundant, <b>timely, retrospective</b> , used by other monitoring programs, comprehensible, applicable to policy and management goals | [16,25,26,66–68]       |

**Table S2.** Percentage contributions of examined studies per ecosystem type by remote sensing (RS) type, top ten RS sensors, top five resolutions, and top five vegetation indices (VIs).

| Ecosystem type           | Forest        |       | Grassland     |       |
|--------------------------|---------------|-------|---------------|-------|
| <i>RS type</i>           |               |       |               |       |
|                          | Multispectral | 45.3% | Multispectral | 52.8% |
|                          | LiDAR         | 17.3% | Hyperspectral | 22.2% |
|                          | Hyperspectral | 13.3% | UAV/Aerial    | 12.5% |
|                          | UAV/Aerial    | 13.3% | Radar         | 6.9%  |
|                          | Radar         | 10.7% | LiDAR         | 5.6%  |
| <i>Top 10 RS sensors</i> |               |       |               |       |
|                          | Landsat       | 20.9% | Landsat       | 23.1% |
|                          | MODIS         | 10.1% | MODIS         | 17.9% |
|                          | LiDAR         | 10.1% | Hyperspectral | 12.6% |
|                          | Aerial        | 6.2%  | Aerial        | 5.3%  |
|                          | AVHRR         | 5.4%  | AVHRR         | 5.3%  |
|                          | SPOT          | 4.7%  | Sentinel      | 5.3%  |
|                          | SAR           | 3.9%  | AVIRIS        | 4.2%  |
|                          | AVIRIS        | 3.1%  | LiDAR         | 4.2%  |

|                              |       |                               |       |
|------------------------------|-------|-------------------------------|-------|
| Hyperspectral                | 3.1%  | Digital Multispectral Imagery | 2.1%  |
| EnMAP                        | 2.30% | Hyperion                      | 2.1%  |
| <i>Top 5 resolutions (m)</i> |       |                               |       |
| 30                           | 21.7% | 30                            | 30.0% |
| 1000                         | 17.4% | 250                           | 12.0% |
| 10                           | 3.6%  | 10                            | 10.0% |
| 20                           | 3.6%  | 1000                          | 3.6%  |
| 1                            | 3.6%  | 25                            | 3.6%  |
| <i>Top 10 VIs</i>            |       |                               |       |
| NDVI                         | 28.3% | NDVI                          | 31.0% |
| NBR                          | 12.1% | NBR                           | 6.9%  |
| Tasseled Cap                 | 9.1%  | SAVI                          | 6.9%  |
| EVI                          | 4.0%  | Tasseled Cap                  | 6.9%  |
| SAVI                         | 4.0%  | EVI                           | 5.2%  |

**Table S3.** Satellite sensors and derived indices to estimate ecological indicators of the “Soil Chemistry and Structure” attribute in grassland and forest ecosystems

| Satellite sensors                             | Independent variable                                              | Derived ecosystem health indicator | Ecosystem used | Field measurements                                                                                       | Modeling method                              | Example study       |
|-----------------------------------------------|-------------------------------------------------------------------|------------------------------------|----------------|----------------------------------------------------------------------------------------------------------|----------------------------------------------|---------------------|
| TerraSAR-X<br>COSMO-SkyMed<br>SPOT<br>Landsat | NDVI, LAI,<br>FAPAR, FCOVER                                       | Soil moisture content              | Grassland      | Soil moisture, soil roughness, LAI, FAPAR, FCOVER, biomass, vegetation water content, vegetation height, | Multi-layer perceptron neural networks       | El Hajj et al. [88] |
| LiDAR                                         | DTW                                                               |                                    | Forest         | Soil bulk density and chemicals, gravimetric water content, soil pH                                      | Linear mixed-effect model                    | Sewell et al. [89]  |
| AirSAR<br>AVIRIS<br>Landsat                   | LTCG, Radar C <sub>vv</sub> ,<br>L <sub>hv</sub> , NDVI, EVI, PRI | Bare ground cover                  | Grassland      | Canopy percentages                                                                                       | Break points and linear interpolation        | Huang et al. [75]   |
| RADAR<br>ERS-1<br>JERS<br>Landsat             |                                                                   |                                    | Forest         | Training sites’ GPS location for vegetation classification                                               | Maximum likelihood classification            | Ranson et al. [90]  |
| ASTER                                         | SAVI                                                              | Variation of erosion               | Grassland      | Vegetation height, vegetation cover, surface roughness length                                            | Supervised maximum-likelihood classification | Reiche et al. [91]  |

NDVI: Normalized Difference Vegetation Index, LAI: Leaf Area Index, FAPAR: Fraction of Absorbed Photosynthetically Active Radiation, FCOVER: Fraction Vegetation Cover, DTW: Depth-to-water Index, LTCG: Landsat Tasseled Cap Greenness, PRI: Photochemical Reflectance Index, SAVI: Soil Adjusted Vegetation Index.

**Table S4.** Satellite sensors and derived indices to estimate ecological indicators of the “Disturbance” attribute in grassland and forest ecosystems

| Satellite sensors              | Independent variable                                                                                                                                                                                                                                       | Derived ecosystem health indicator  | Ecosystem used | Field measurements                                      | Modeling method                                                                       | Example study        |
|--------------------------------|------------------------------------------------------------------------------------------------------------------------------------------------------------------------------------------------------------------------------------------------------------|-------------------------------------|----------------|---------------------------------------------------------|---------------------------------------------------------------------------------------|----------------------|
| Sentinel-2                     | SR, NDVI, EVI, RCI, NDVI <sub>n</sub> , PVI <sub>n</sub> , GSAVI <sub>n</sub> , MSAVI <sub>n</sub> , NDVI <sub>ngreen</sub> , EVI <sub>n</sub> , EVI <sub>2n</sub> , MTVI <sub>1n</sub> , NDII <sub>7n</sub> , NDVI <sub>re2n</sub> , NDVI <sub>re3n</sub> | Grazing capacity and stocking rate  | Grassland      | Dried aboveground biomass                               | Resource Selection Functions and Multiple linear regression                           | Doan [69]            |
| Sentinel-2<br>Landsat<br>RADAR | NBR, NDVI, LST                                                                                                                                                                                                                                             | Seasonal timing of disturbance      | Grassland      | Species identification, species abundance, soil samples | Vegetation species response capacity model                                            | Adagbasa et al. [92] |
| Landsat<br>MODIS               | NBR                                                                                                                                                                                                                                                        |                                     | Forest         |                                                         | Decision tree analysis                                                                | Loboda et al. [93]   |
| Landsat                        | NDVI, NPV, MASD, FVC                                                                                                                                                                                                                                       | Disturbance intensity               | Grassland      | Aboveground biomass                                     | Artificial neural networks and ANOVA                                                  | Li et al. [82]       |
| MODIS<br>Landsat               | NBR, dNBR, RdNBR                                                                                                                                                                                                                                           |                                     | Forest         |                                                         | Distributional statistics, Linear and Non-linear regression algorithms                | Heward et al. [94]   |
| Landsat<br>MODIS               | Band 7/Band 5, NDVI, NBR, dNBR, RdNBR, Kauth Thomas brightness – greenness - wetness                                                                                                                                                                       | Disturbance extent                  | Forest         | Residual organic layer depth                            | Random forest algorithm                                                               | Barrett et al. [95]  |
| HyMAP<br>Landsat               | MSI, CRI1, GNDVI, ARI2, NDVI, NWI2, NSMI, GOSAVI, NPCI, TCARI, DI1                                                                                                                                                                                         | Defoliation and tree mortality rate | Forest         |                                                         | Classification algorithms Naïve Bayes, Support Vector Machine, Decision tree analysis | Lausch et al. [21]   |

SR: Simple Ratio, NDVI: Normalized Difference Vegetation Index, EVI: Enhanced Vegetation Index, RCI: Ratio Cover Index, NDVI<sub>n</sub>: Narrow Normalized Difference Vegetation Index, PVI<sub>n</sub>: Narrow Perpendicular Vegetation Index, GSAVI<sub>n</sub>: Narrow Green Normalized Difference Vegetation Index, MSAVI<sub>n</sub>: Narrow Modified Soil-adjusted Vegetation Index, NDVI<sub>ngreen</sub>: Narrow Green Normalized Difference Vegetation Index, EVI<sub>n</sub>: Narrow Enhanced Vegetation Index, EVI<sub>2n</sub>: Narrow Enhanced Vegetation Index 2, MTVI<sub>1n</sub>: Narrow Modified Triangular Vegetation Index 1, NDII<sub>7n</sub>: Narrow Normalized Difference Infrared Index 7, NDVI<sub>re2n</sub>: Narrow Normalized Difference Vegetation Index red-edge 2, NDVI<sub>re3n</sub>: Narrow Normalized Difference Vegetation Index red-edge 3, NBR:

Normalized Burn Ratio, LST: Land Surface Temperature, NPV: Non-photosynthetic Vegetation, MASD: Mean Absolute Spectral Dynamic, FVC: Fractional Vegetation Cover, dNBR: Difference NBR, RdNBR: Relativized dNBR, MSI: Moisture Stress Index, CRI1: Carotenoid Reflectance Index 1, GNDVI: Green NDVI, ARI2: Anthocyanin Reflectance Index 2, NWI2: Normalized Water Index 2, NSMI: Normalized Difference Soil Moisture Index, GOSAVI: Green Optimized SAVI, NPCI: Normalized Pigment Chlorophyll Ratio Index, TCARI: Transformed Chlorophyll Absorption Reflectance Index, DII: Derivative Index.

**Table S5.** Satellite sensors and derived indices to estimate ecological indicators of “Fragmentation” and “Hydrology” attributes in grassland and forest ecosystems

| Satellite sensors | Independent variable  | Derived ecosystem health indicator                                    | Ecosystem used | Field measurements                                           | Modeling method               | Example study        |
|-------------------|-----------------------|-----------------------------------------------------------------------|----------------|--------------------------------------------------------------|-------------------------------|----------------------|
| MODIS             | NDVI                  |                                                                       | Grassland      |                                                              | Improved Costanza model       | Suo et al. [96]      |
|                   | Digital Number values | Landscape diversity index                                             | Forest         | Shannon Index, Simpson Index, Pielou evenness, Renyl Indices | Open-Source Program GRASS-GIS | Rocchini et al. [46] |
|                   |                       | Number of patches                                                     |                |                                                              |                               |                      |
|                   |                       | Mean patch size                                                       |                |                                                              |                               |                      |
|                   |                       | Linear forest clearings density                                       |                |                                                              |                               |                      |
|                   |                       | Edge density                                                          | Forest         |                                                              | Patch analysis                | Pattison et al. [68] |
|                   |                       | Percent of land occupied/unoccupied by linear forest clearings (LFCs) |                |                                                              |                               |                      |
| AVHRR             | NDVI                  | Winter snow coverage                                                  | Grassland      |                                                              | Least-squares method          | Wang & Qiao [86]     |

NDVI: Normalized Difference Vegetation Index
