# Supplementary material
Source: MDPI journal article supplement (https://www.mdpi.com/2072-4292/13/16/3262)

**(a)** Disturbance regimes

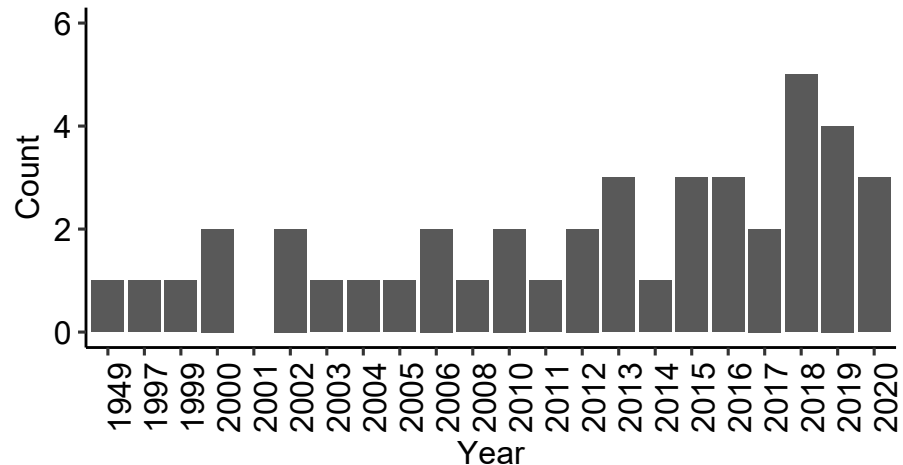

**(b)** Developments

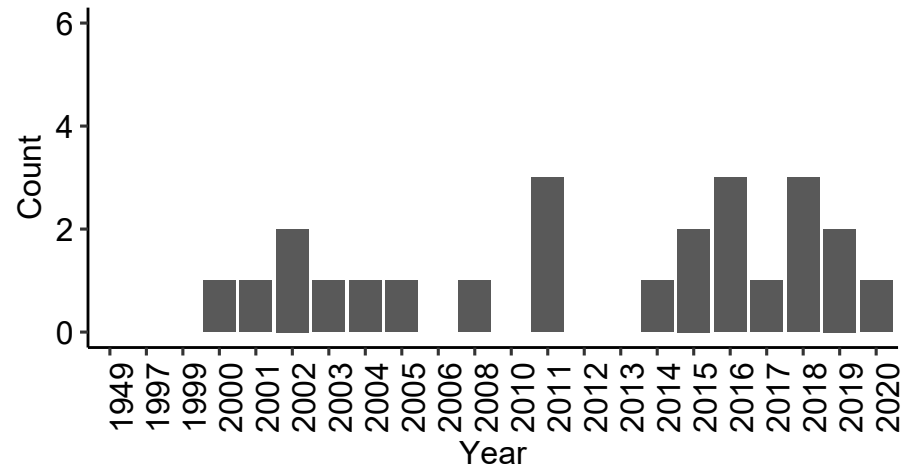

**(c)** Invasive & Other Problematic Species & Genes

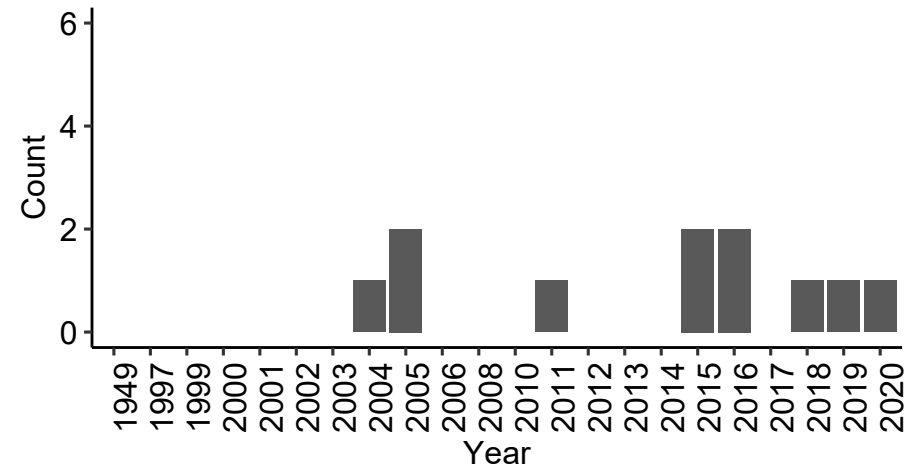

**(d)** Pollution

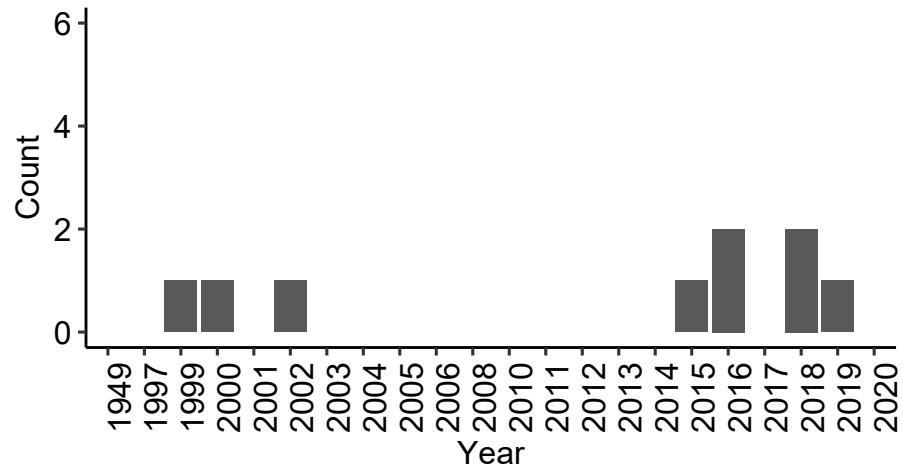

**(e)** Agriculture & Aquaculture

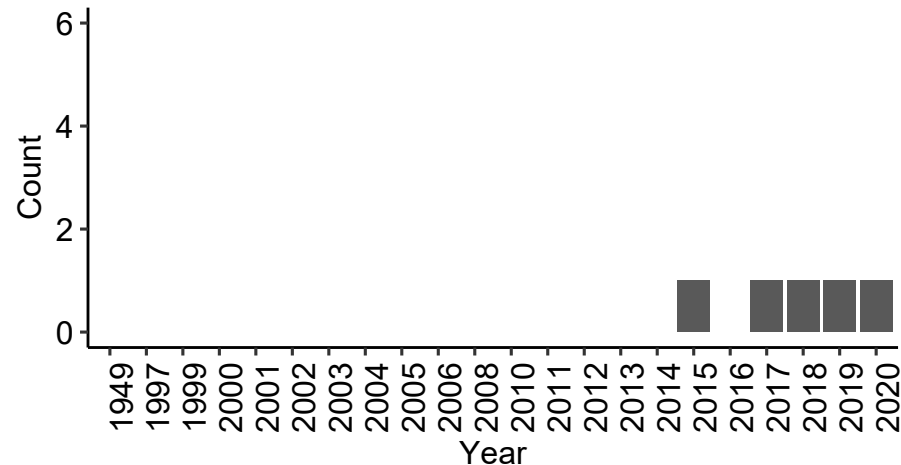

Supplement: s1 [file s1]
