# Supplementary material
Source: MDPI journal article supplement (https://www.mdpi.com/2072-4292/13/16/3262)

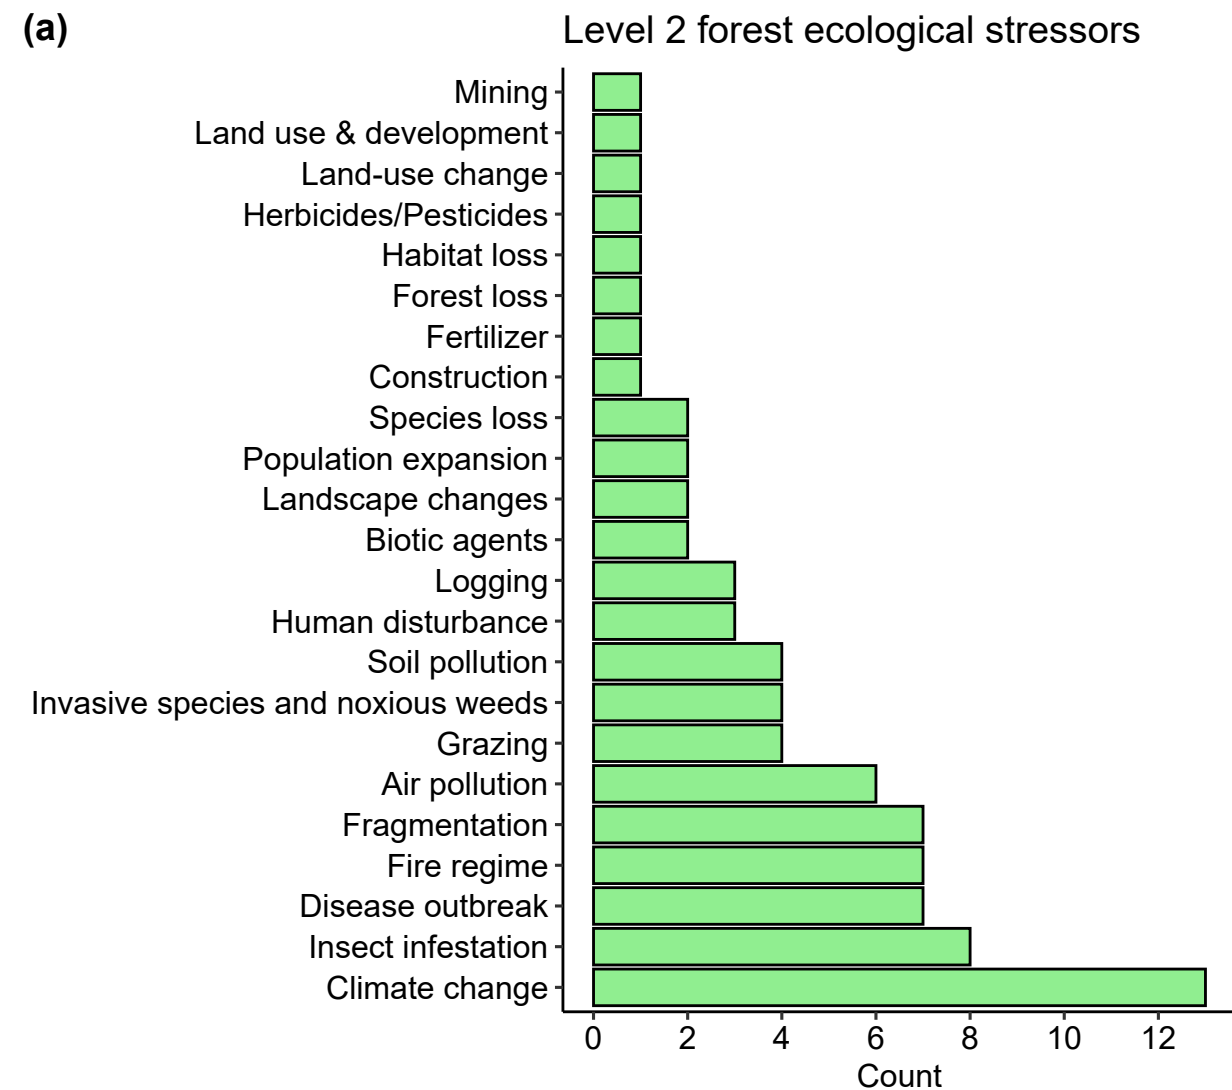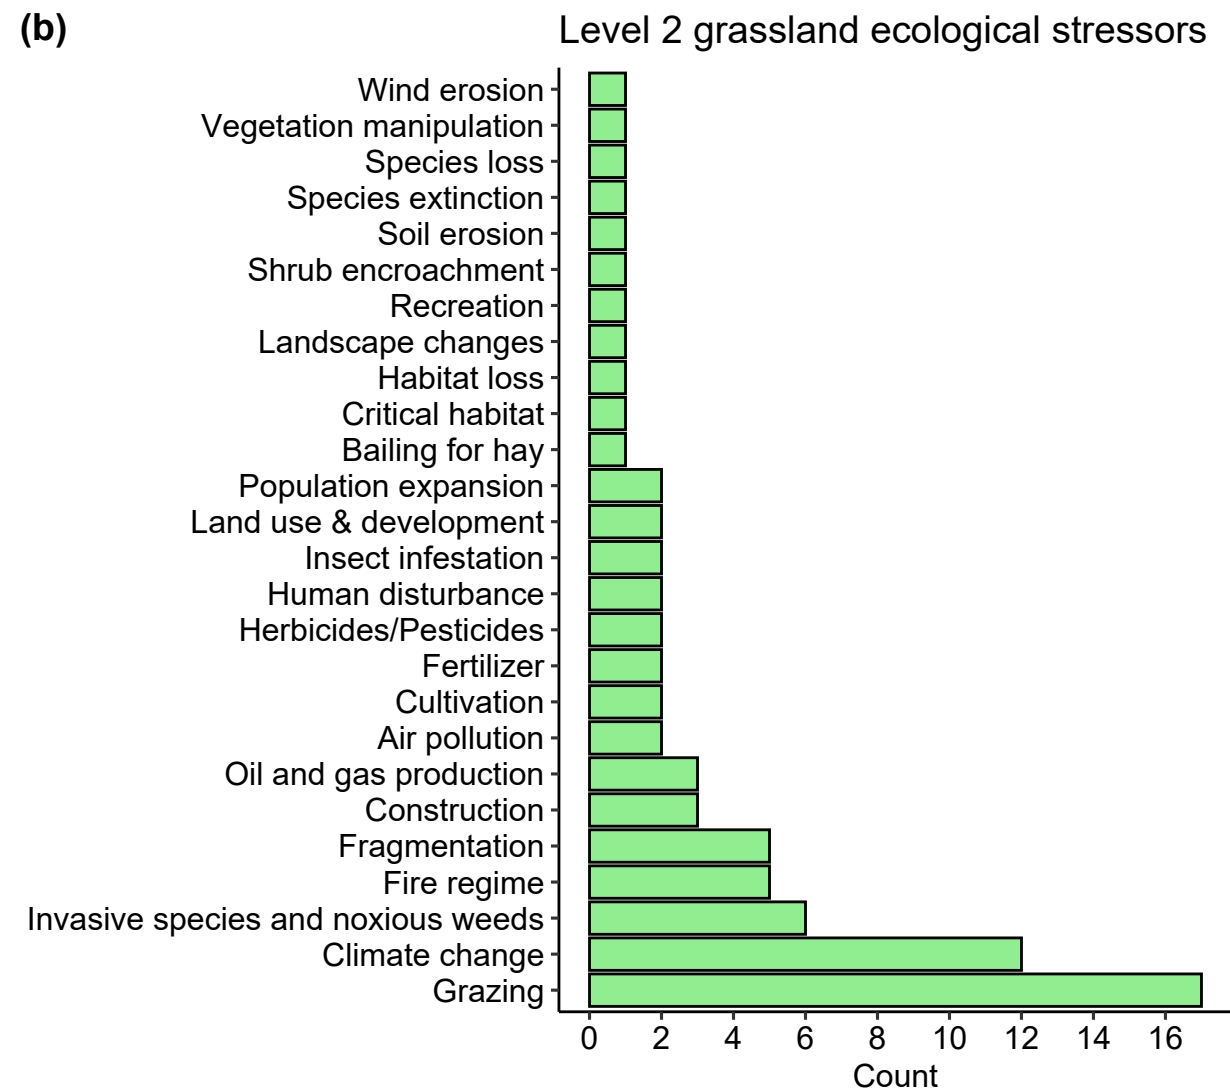

Supplement: s1 [file s1]

**(a)** Landsat

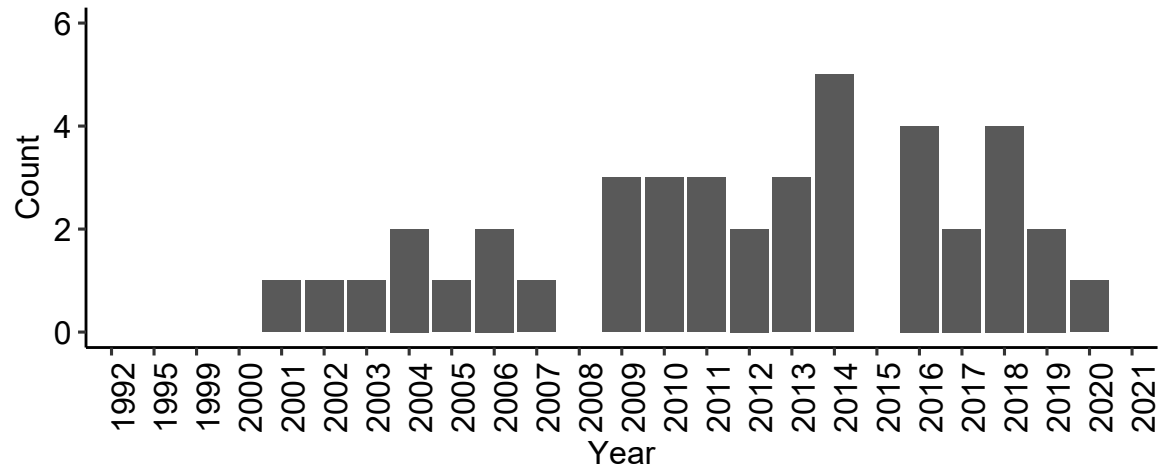

**(b)** MODIS

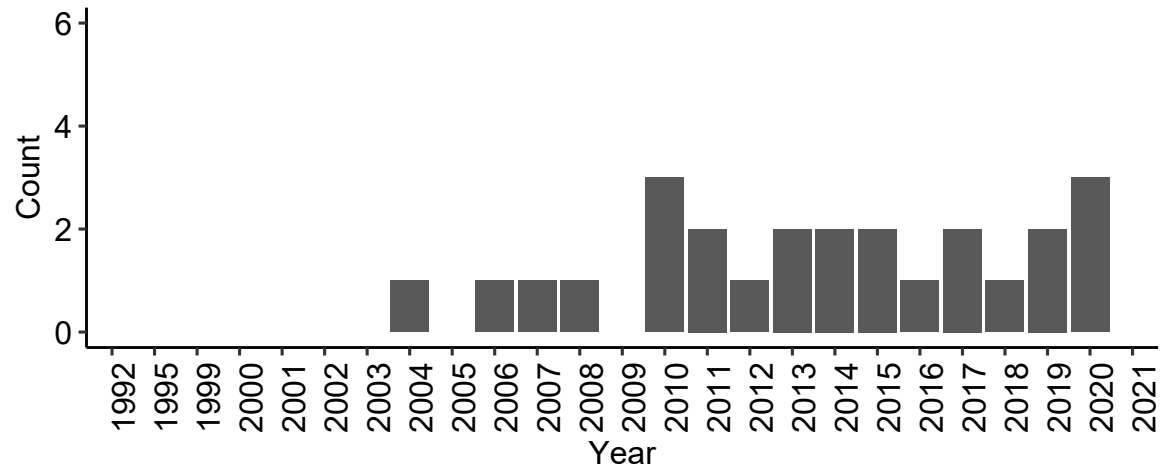

**(c)** Sentinel

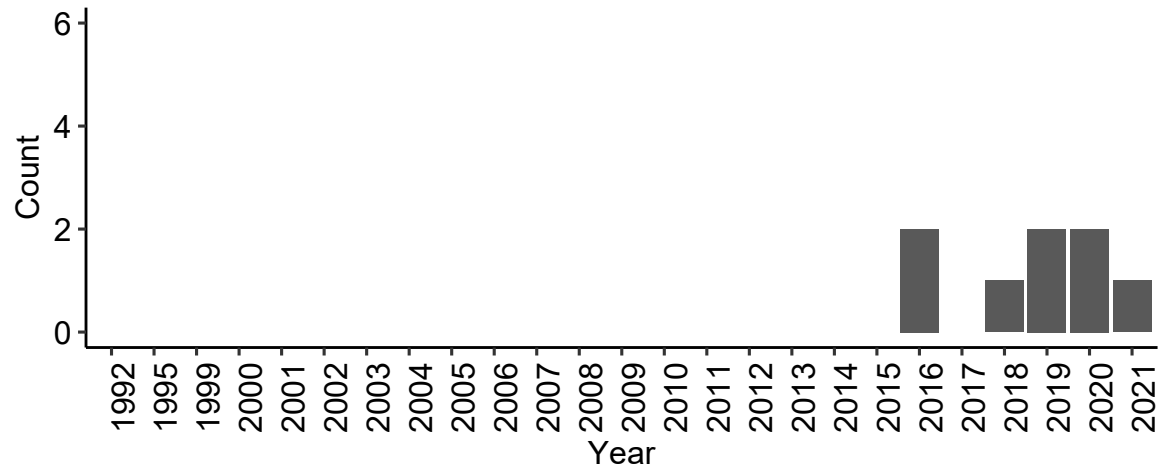

Supplement: s1 [file s1]

**(a)** Hyperspectral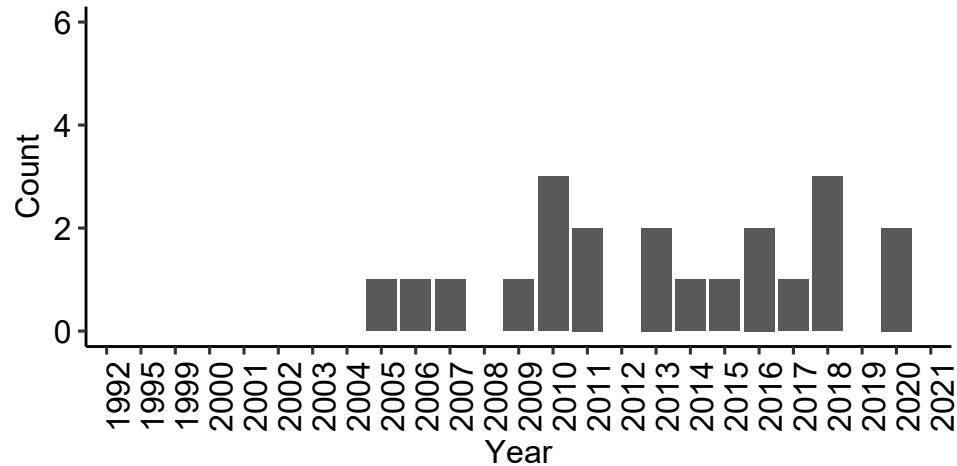**(b)** LiDAR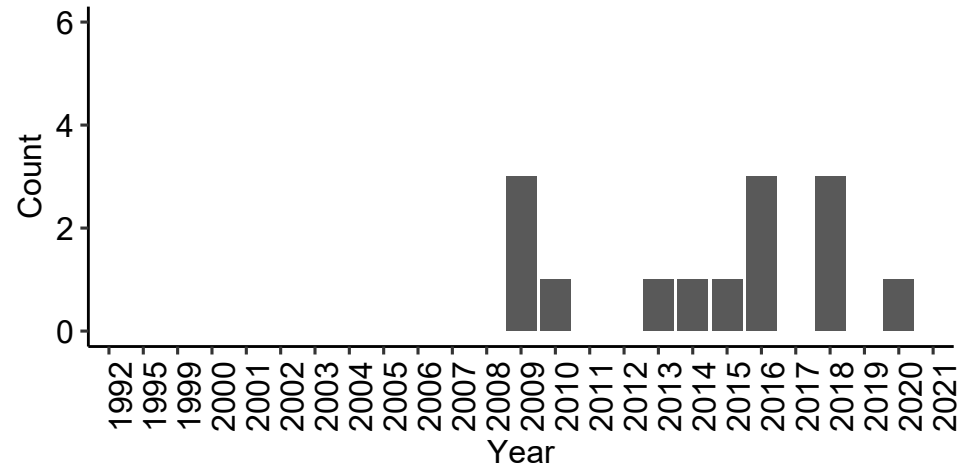**(c)** Multispectral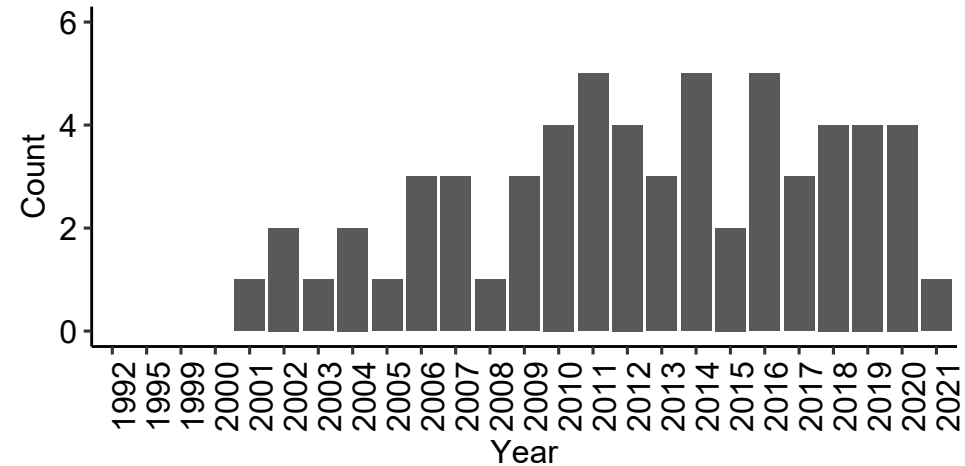**(d)** UAV/Aerial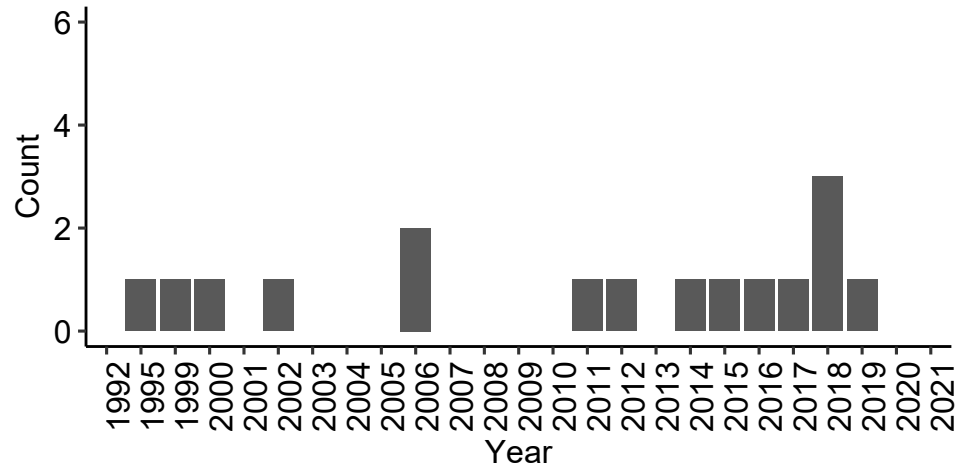**(e)** Radar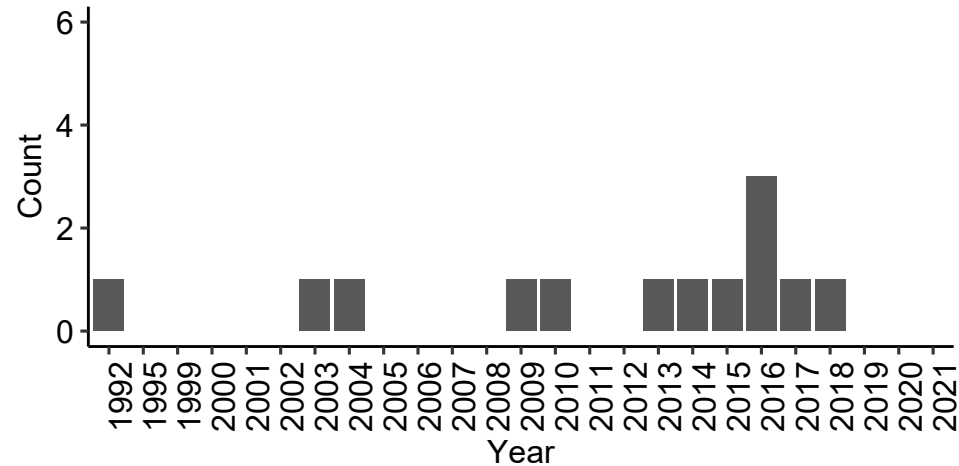

Supplement: s1 [file s1]

**(a)**

### Level 1 forest ecological stressors

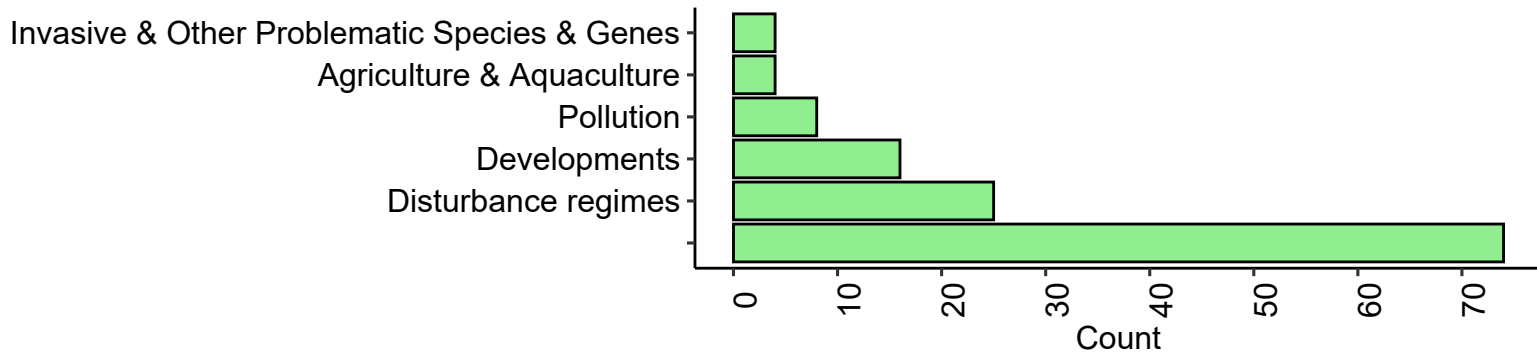

**(b)**

### Level 1 grassland ecological stressors

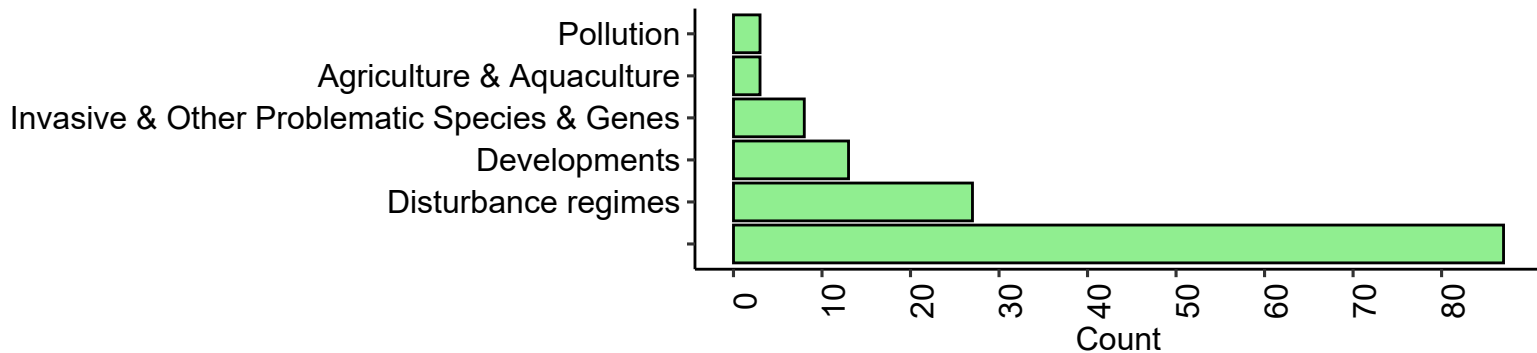

Supplement: s1 [file s1]

**(a)** Quantitative

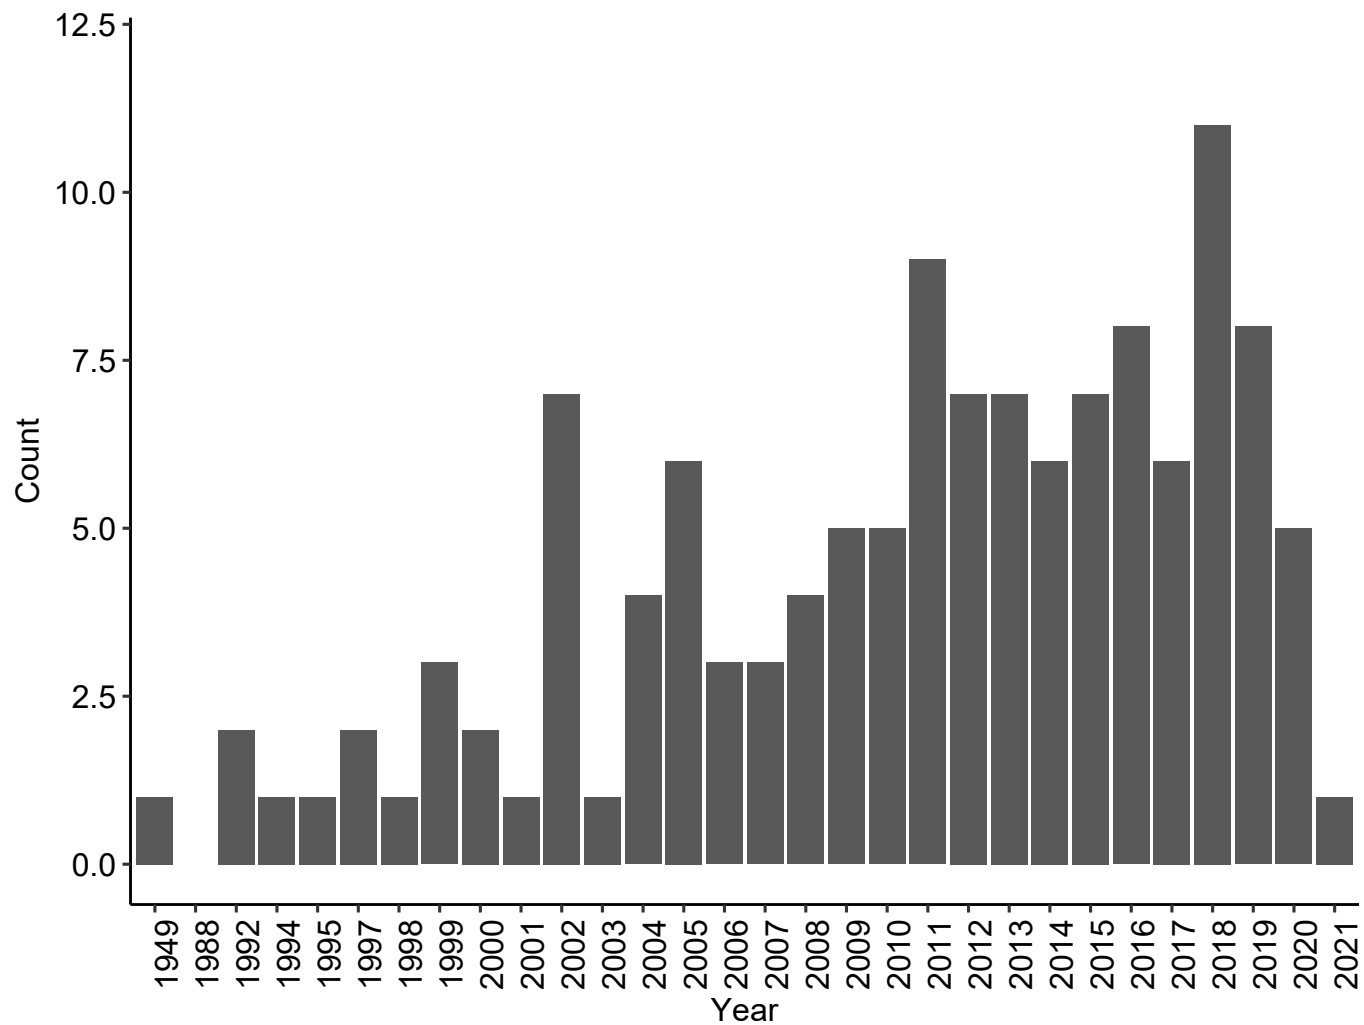

**(b)** Qualitative

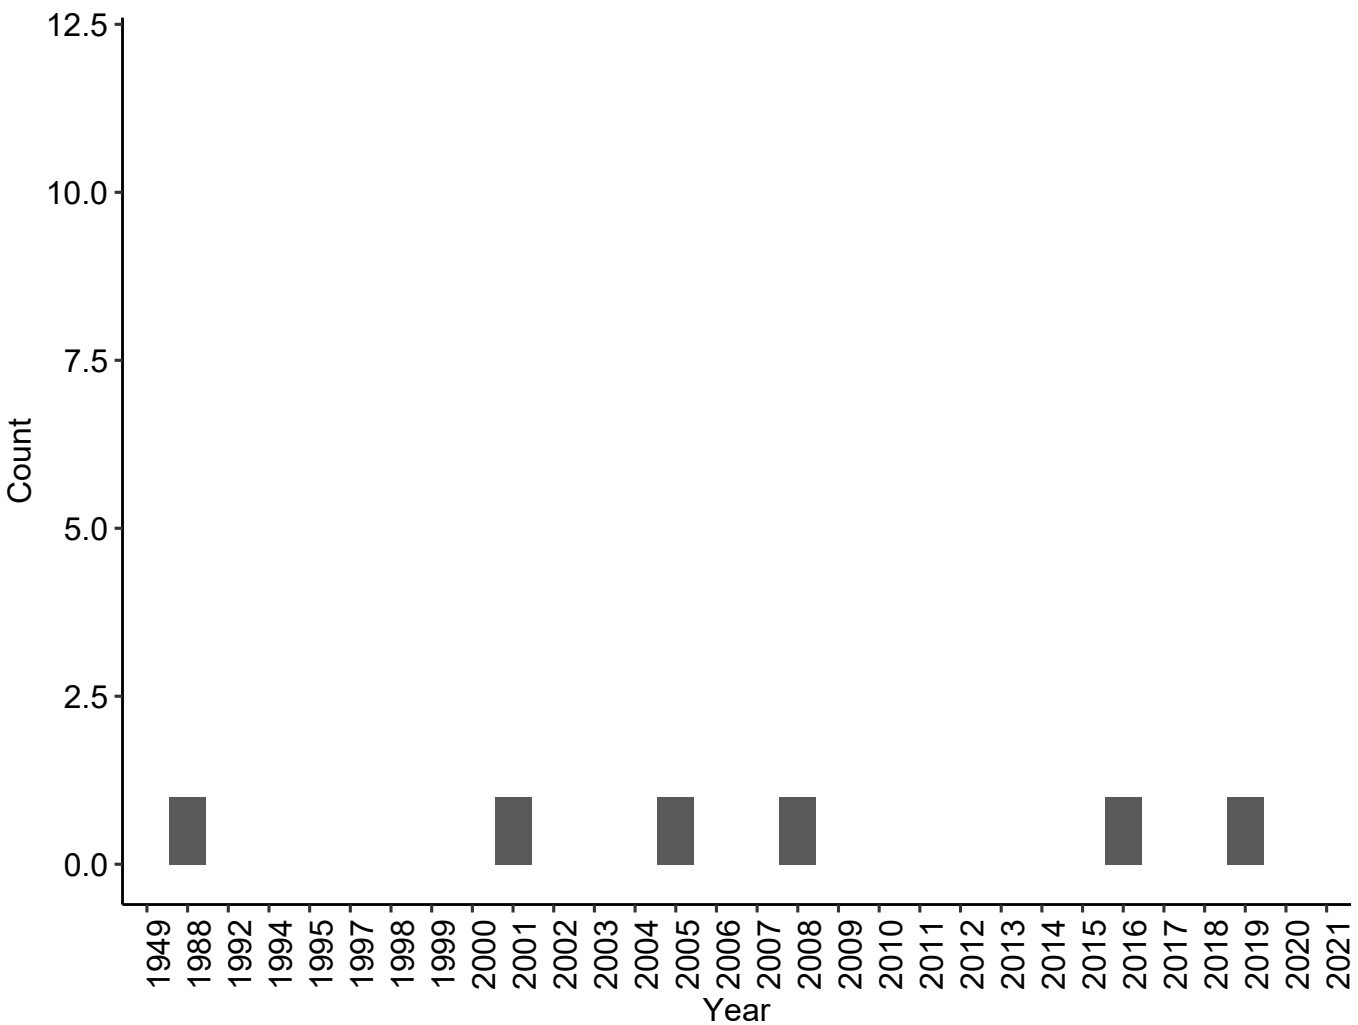

Supplement: s1 [file s1]

**(a)** Forest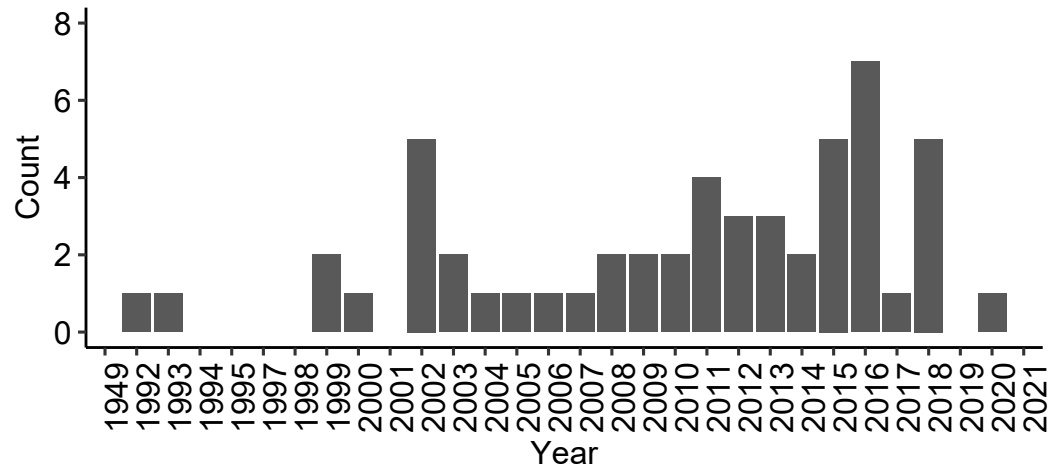**(b)** Grassland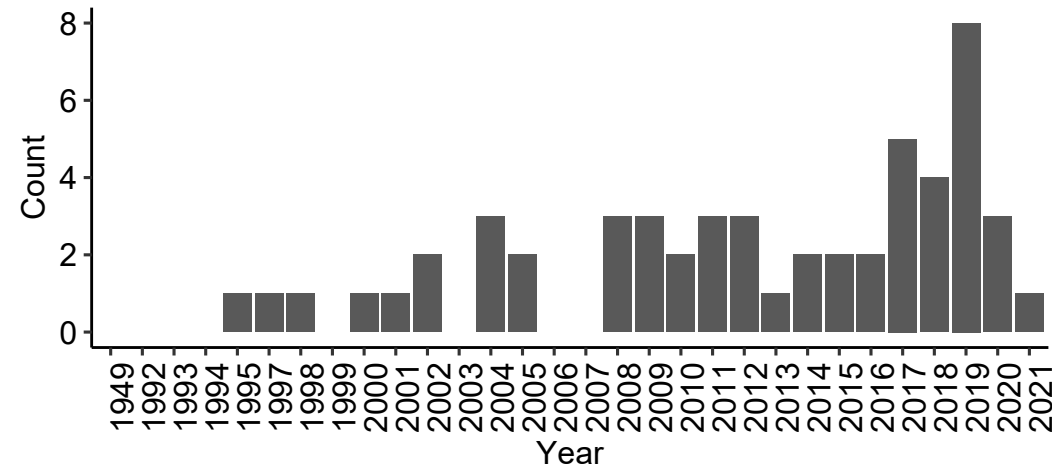**(c)** Forest & Grassland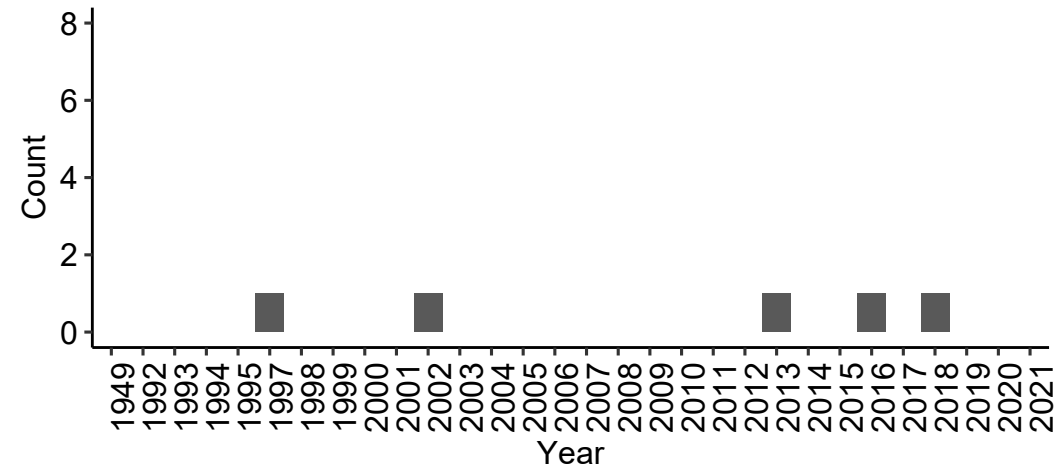**(d)** Grassland & Shrubland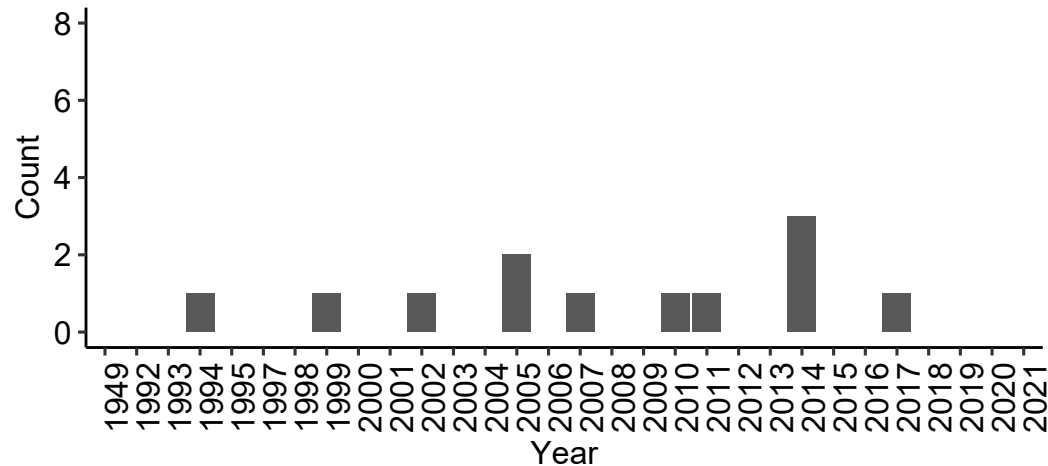**(e)** Forest & Grassland & Shrubland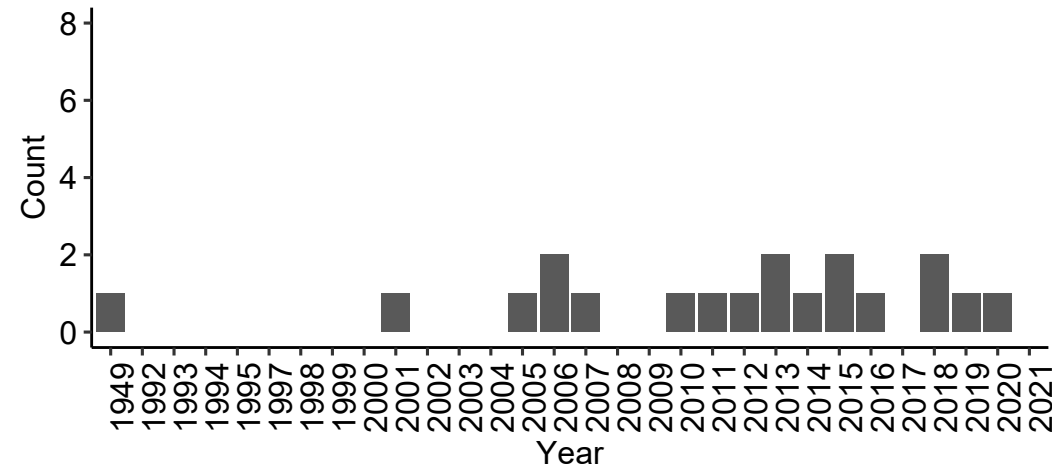

Supplement: s1 [file s1]

**(a) Local**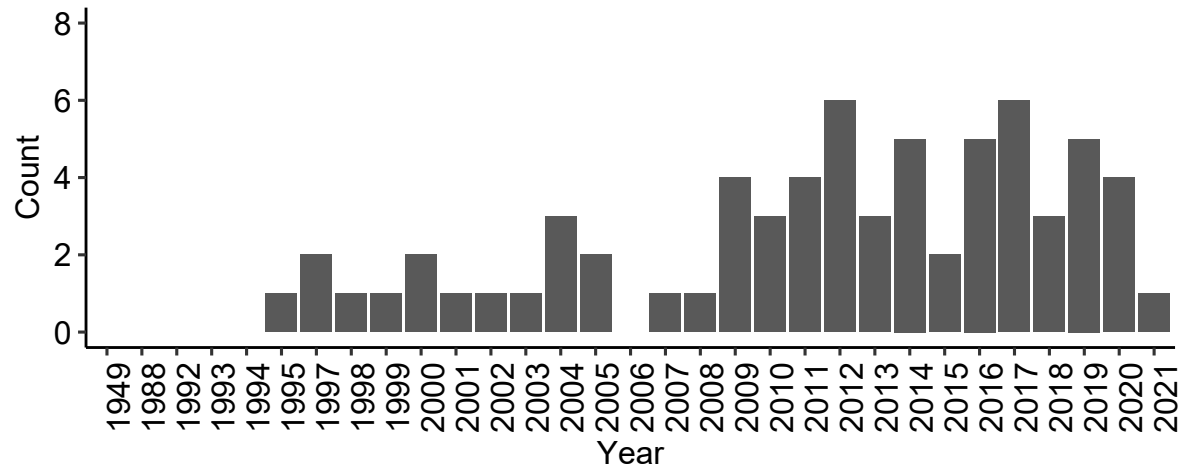**(b) Regional**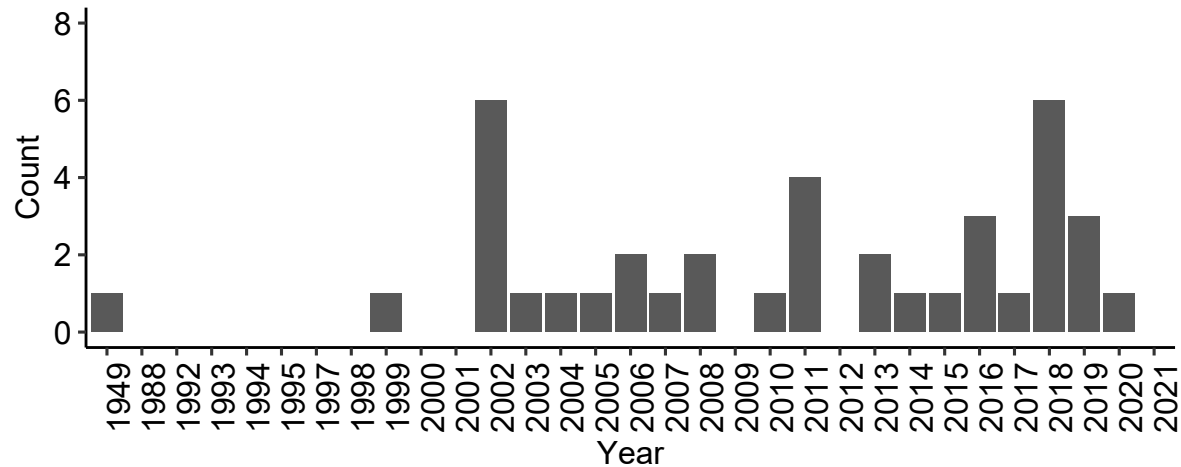**(c) Transnational**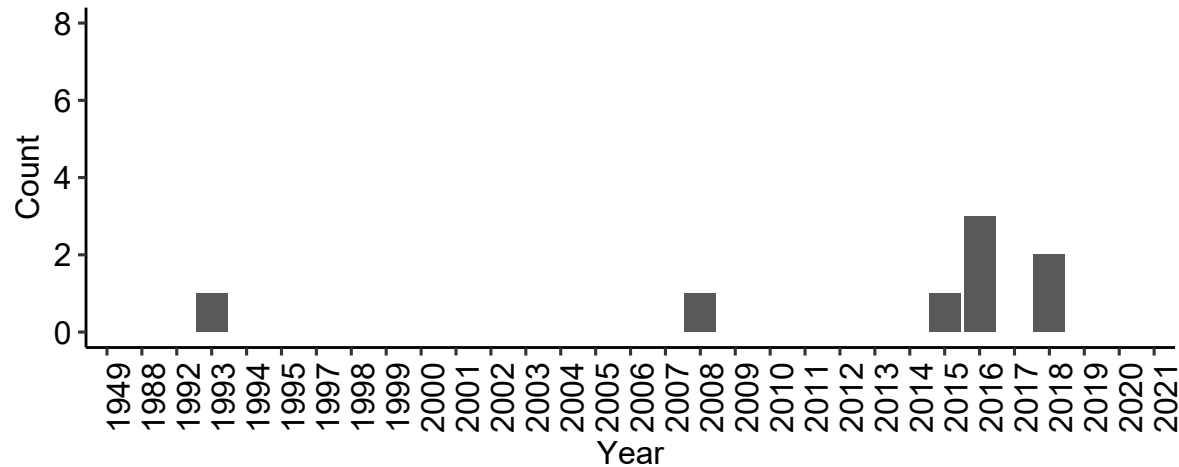

Supplement: s1 [file s1]

**(a) NDVI**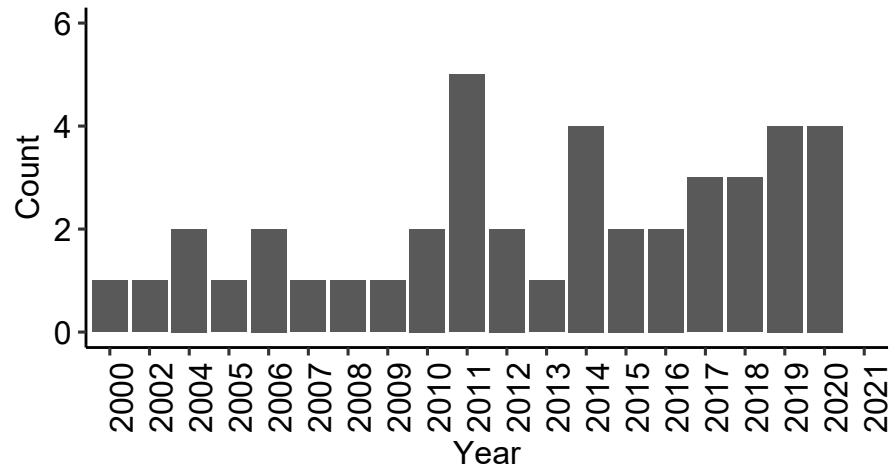**(b) Tasseled Cap**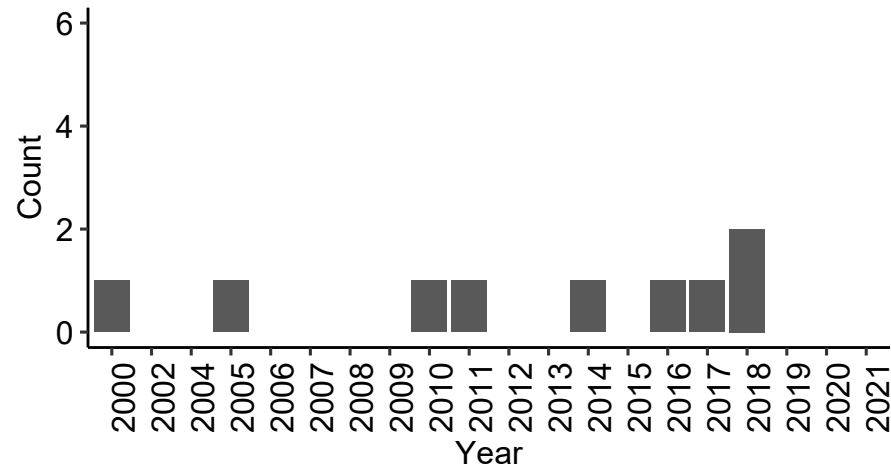**(c) SAVI**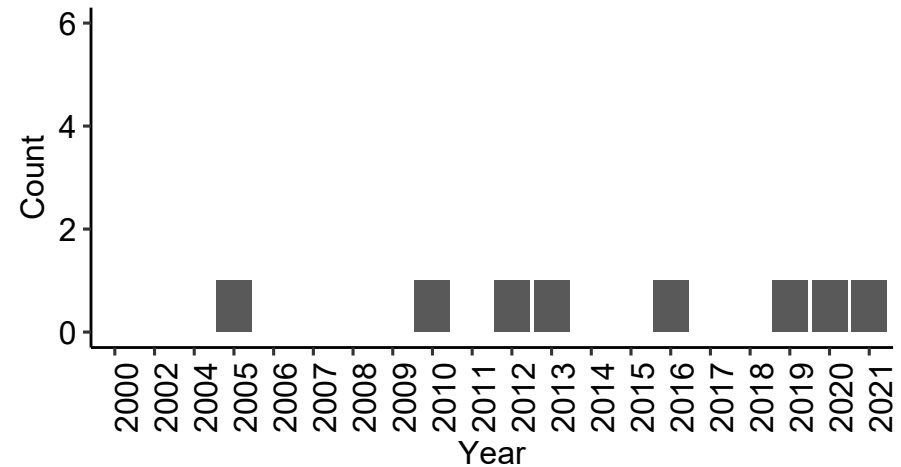**(d) NBR**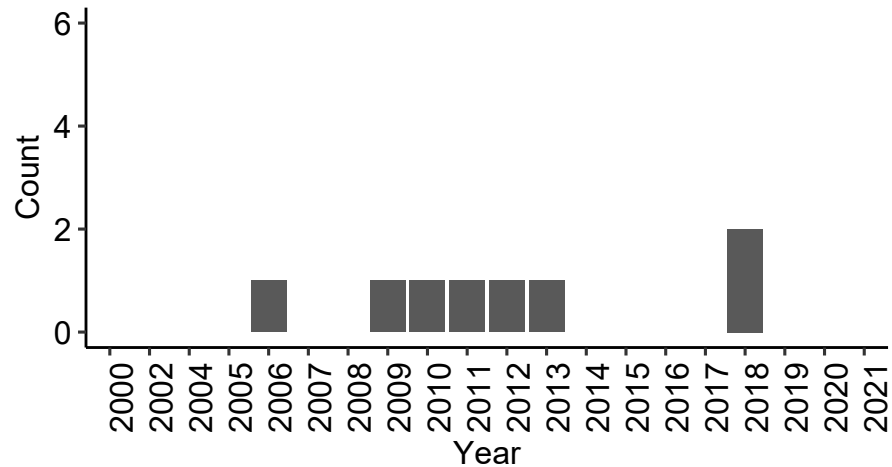**(e) EVI**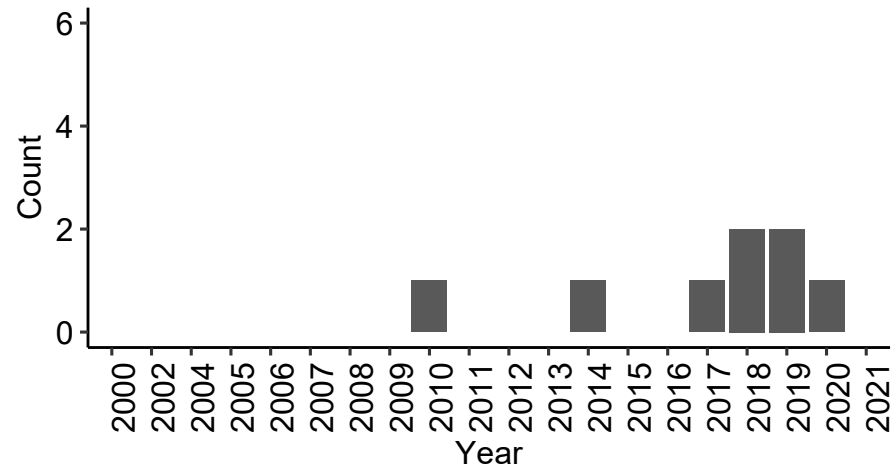

Supplement: s1 [file s1]

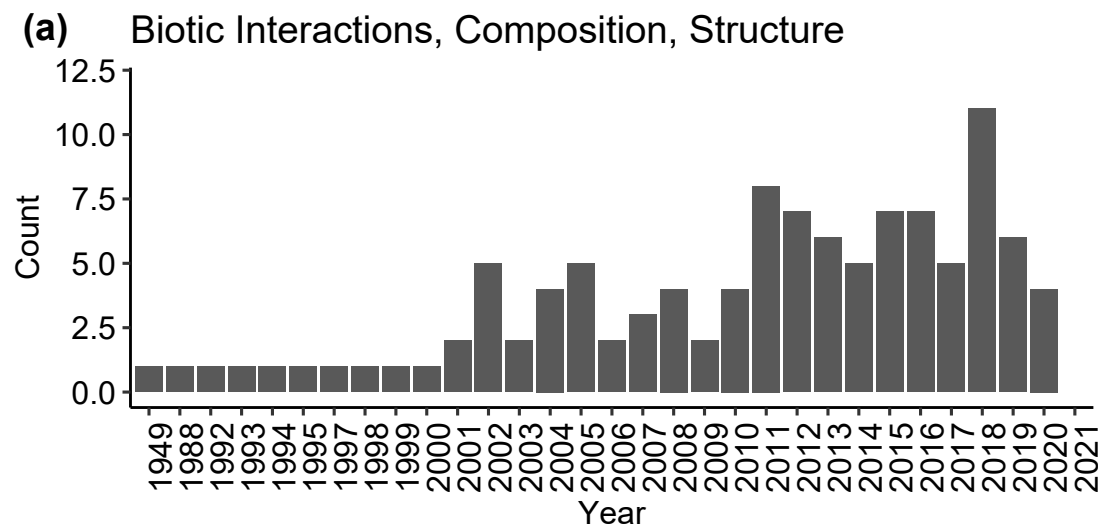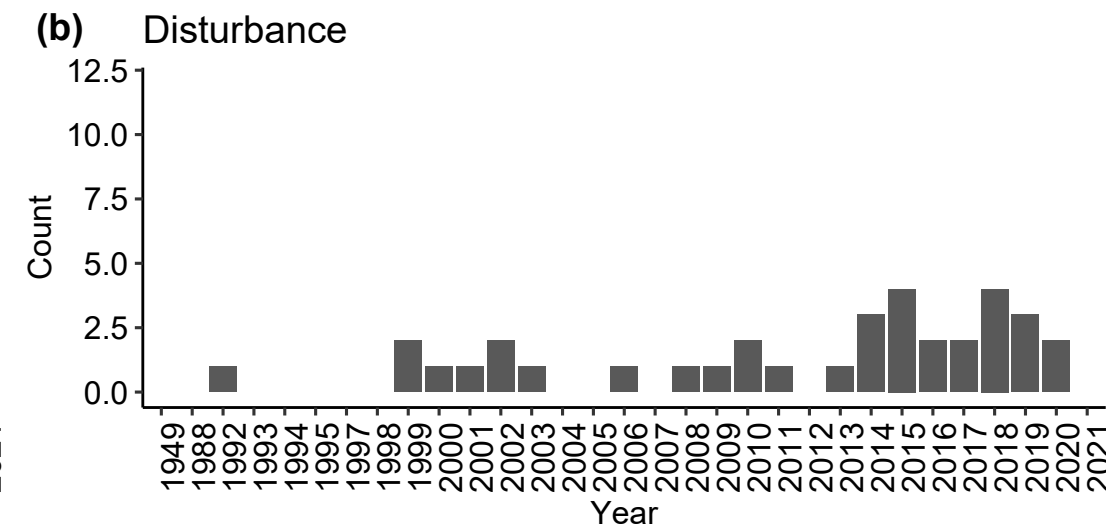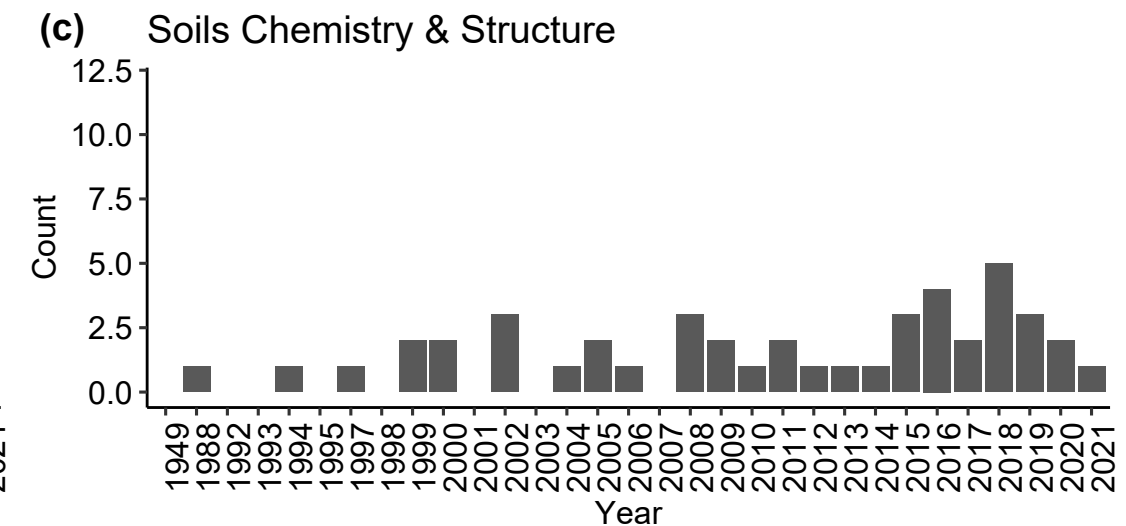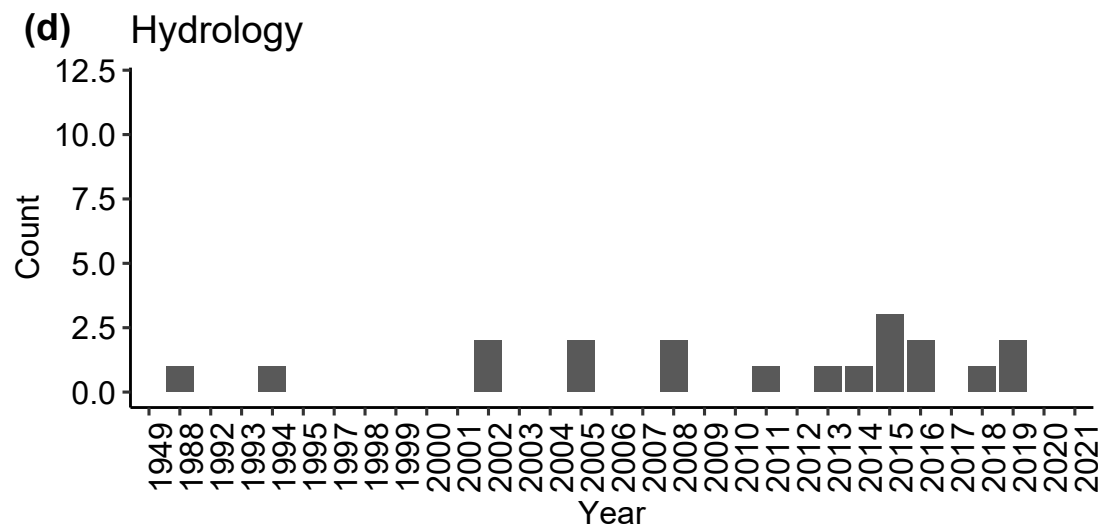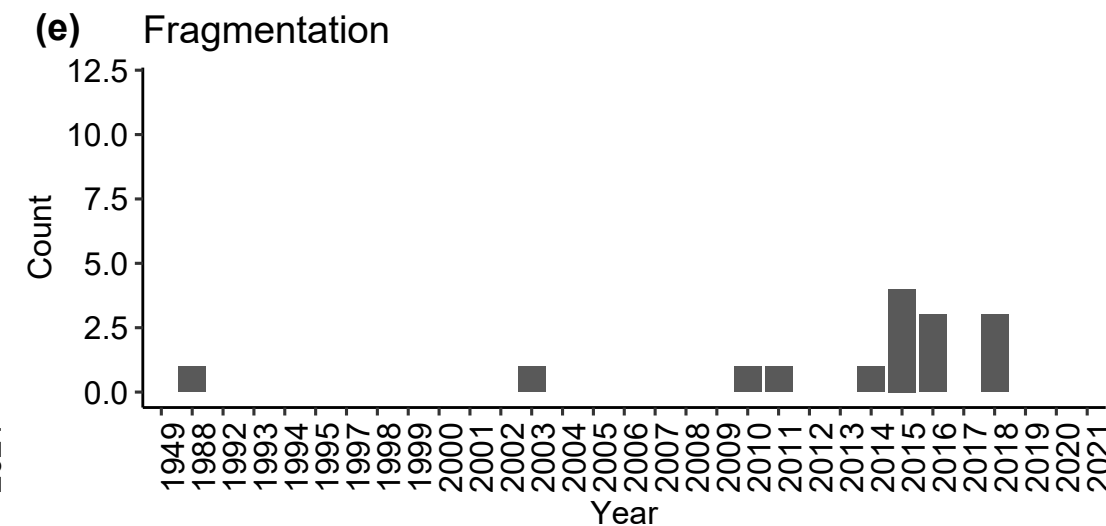

Supplement: s1 [file s1]

**(a) Asia**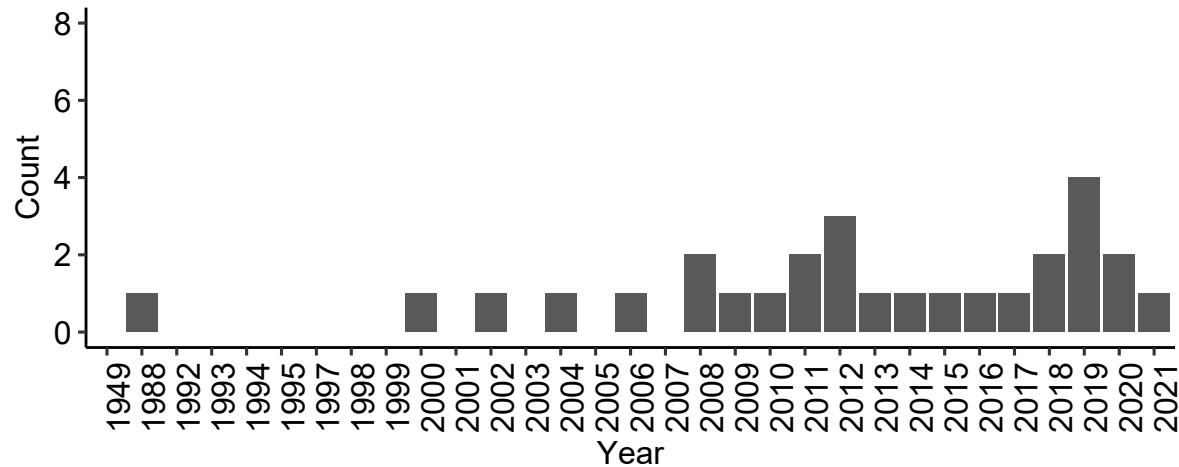**(b) Europe**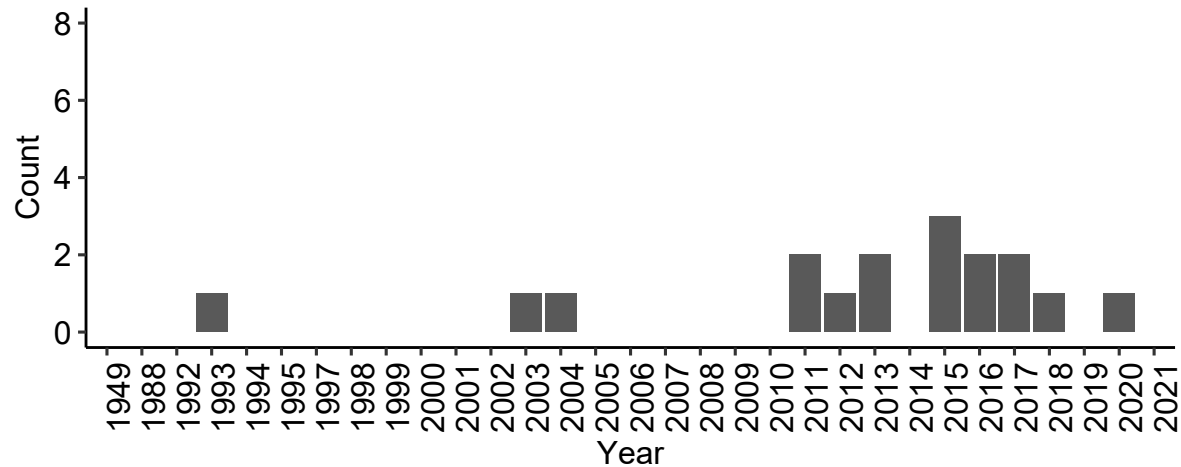**(c) North America**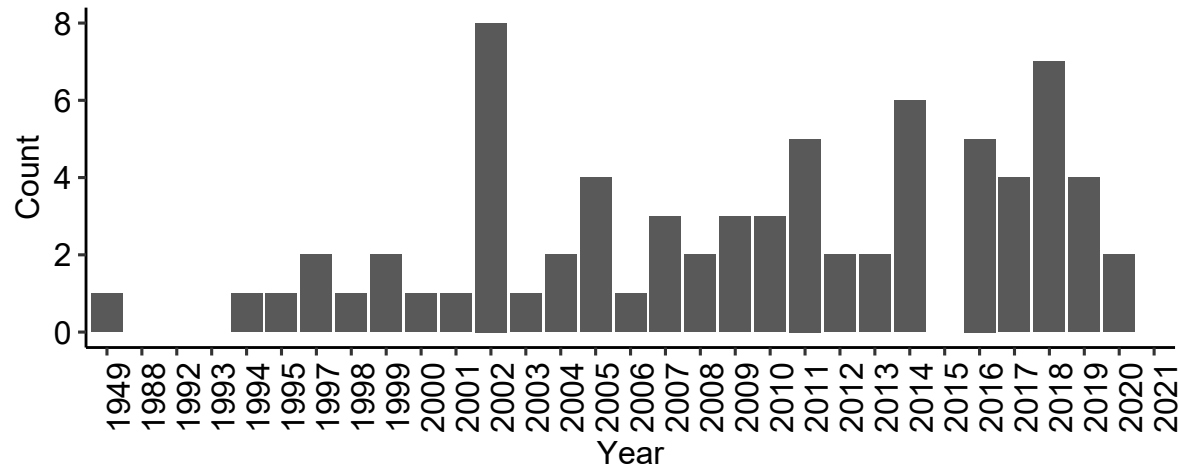

Supplement: s1 [file s1]
